# Supplementary material for: Regulation of EGFR signal transduction by analogue-to-digital conversion in endosomes
Source: eLife journal article supplement (doi:10.7554/elife.06156), 2015-02-04

## Villaseñor\_Figure 6 - figure supplement 2

1: Assemble area histogram from single-vesicle measurements

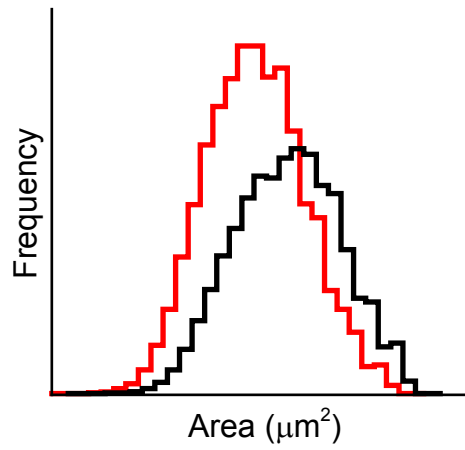

2: Normalize by bin-width and total number of vesicles

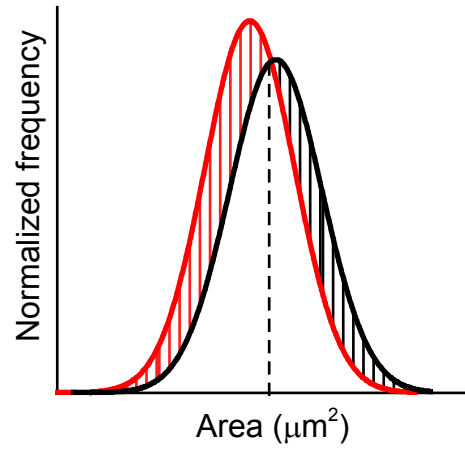

3: Subtract **Function 1** - Function 2

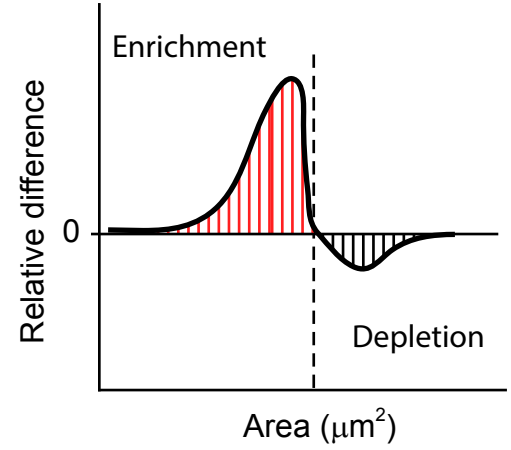

Supplement: supp [file elife_poa_e06156_Figure_6_figure_supplement_2.pdf › elife_poa_e06156_Figure_6_figure_supplement_2.pdf]
