# Supplementary figures and images for: Regulation of EGFR signal transduction by analogue-to-digital conversion in endosomes
Source: eLife journal article supplement (doi:10.7554/elife.06156), 2015-02-04

Villaseñor\_Figure 1 - figure supplement 1

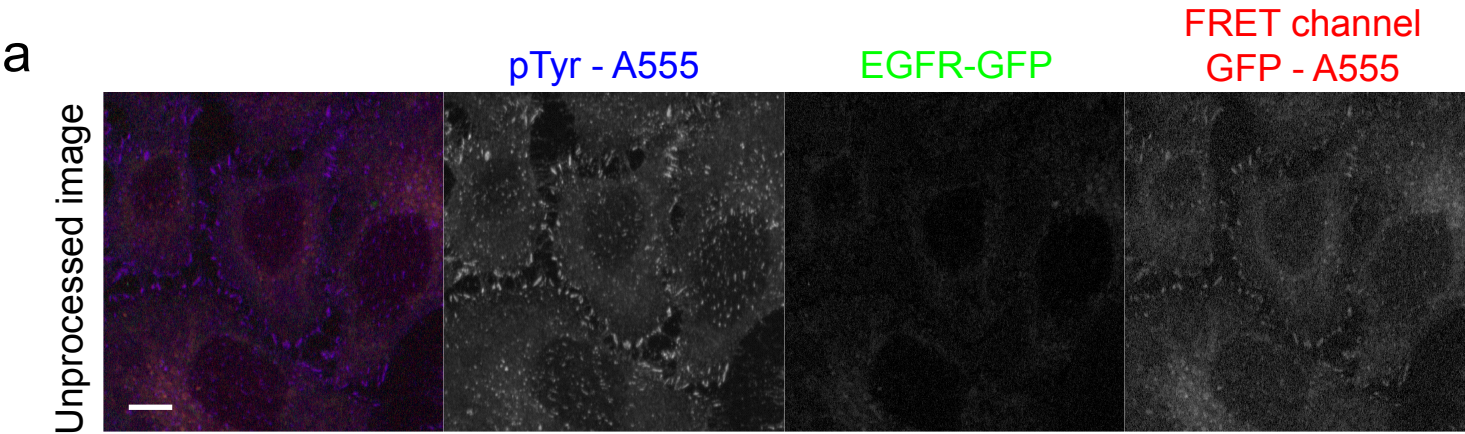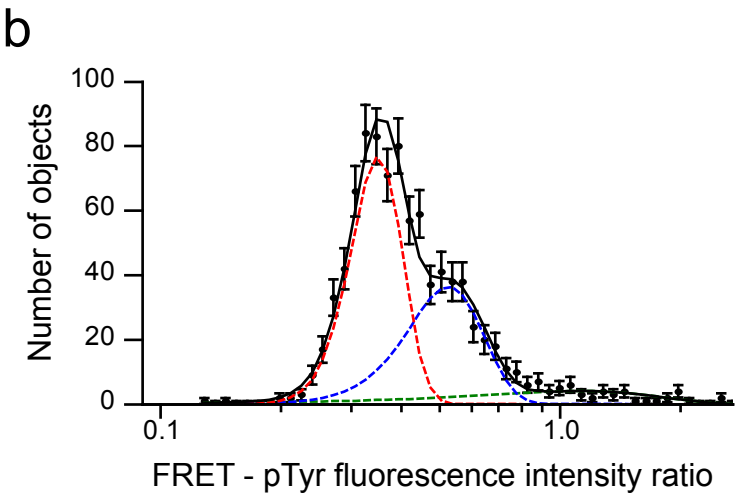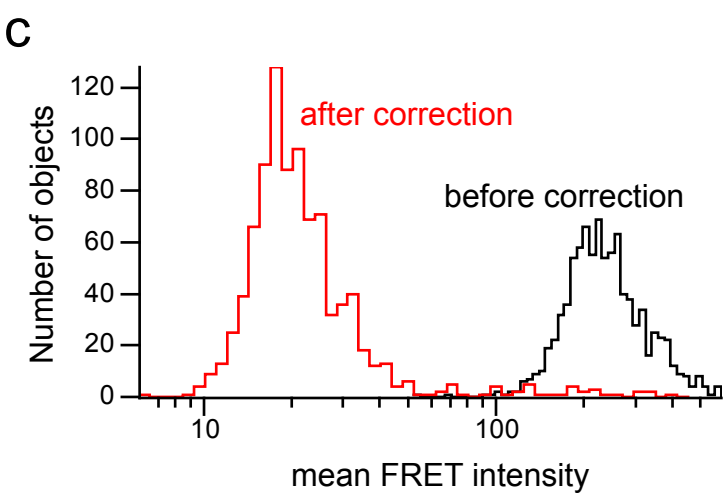

Supplement: supp [file elife_poa_e06156_Figure_1_figure_supplement_1.pdf › elife_poa_e06156_Figure_1_figure_supplement_1.pdf]

# Villaseñor\_Figure 1 - figure supplement 2

a Time after EGF stimulation (min):

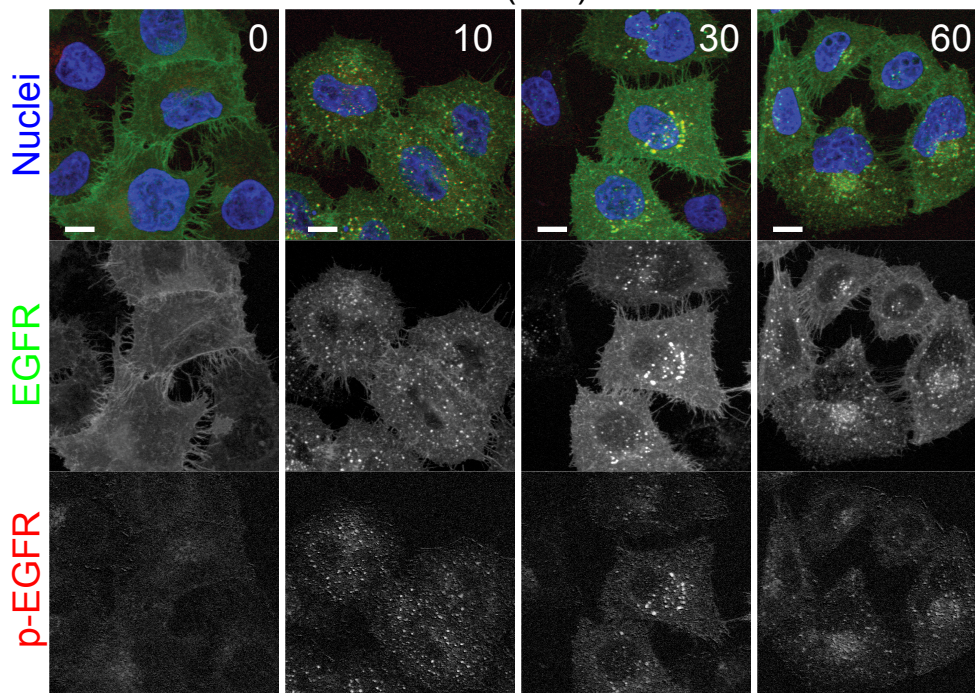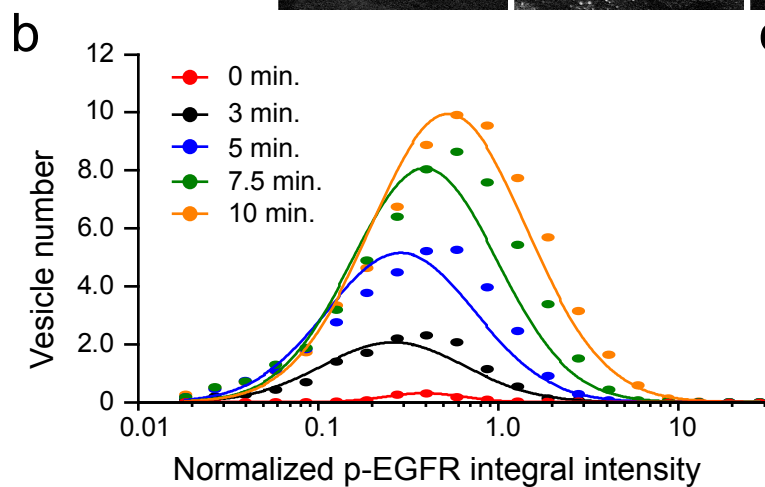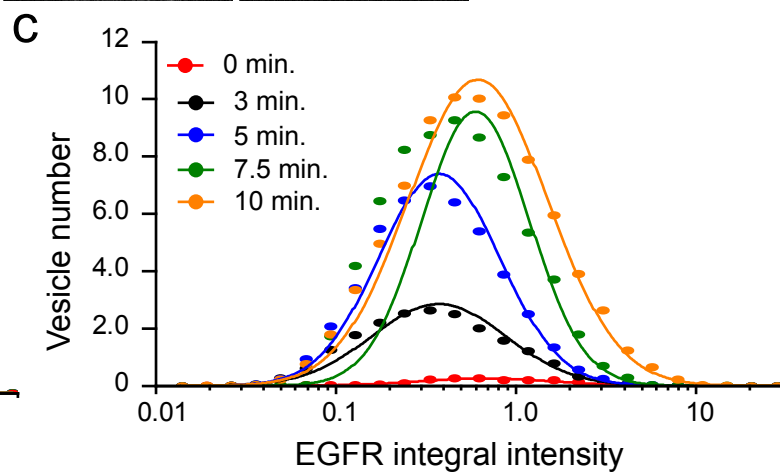

Supplement: supp [file elife_poa_e06156_Figure_1_figure_supplement_2.pdf › elife_poa_e06156_Figure_1_figure_supplement_2.pdf]

Villaseñor\_Figure 1 - figure supplement 3

a

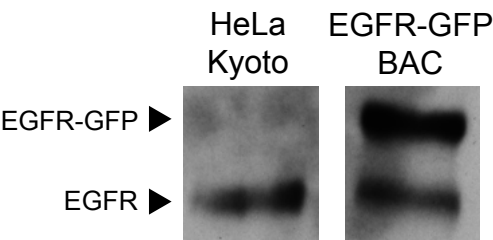

b

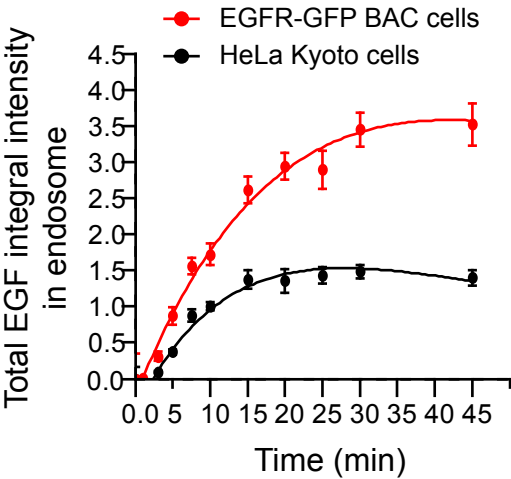

c

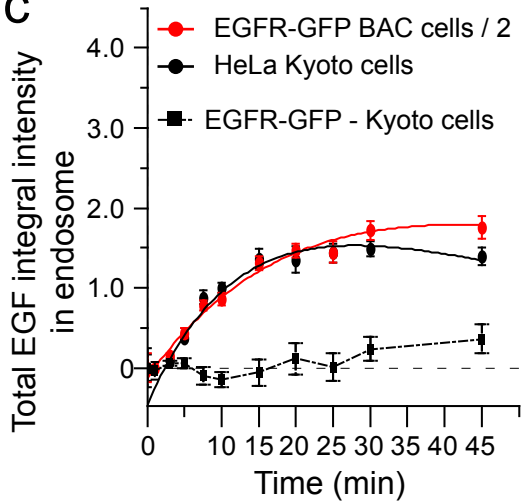

Supplement: supp [file elife_poa_e06156_Figure_1_figure_supplement_3.pdf › elife_poa_e06156_Figure_1_figure_supplement_3.pdf]

# Villaseñor\_Figure 1 - figure supplement 4

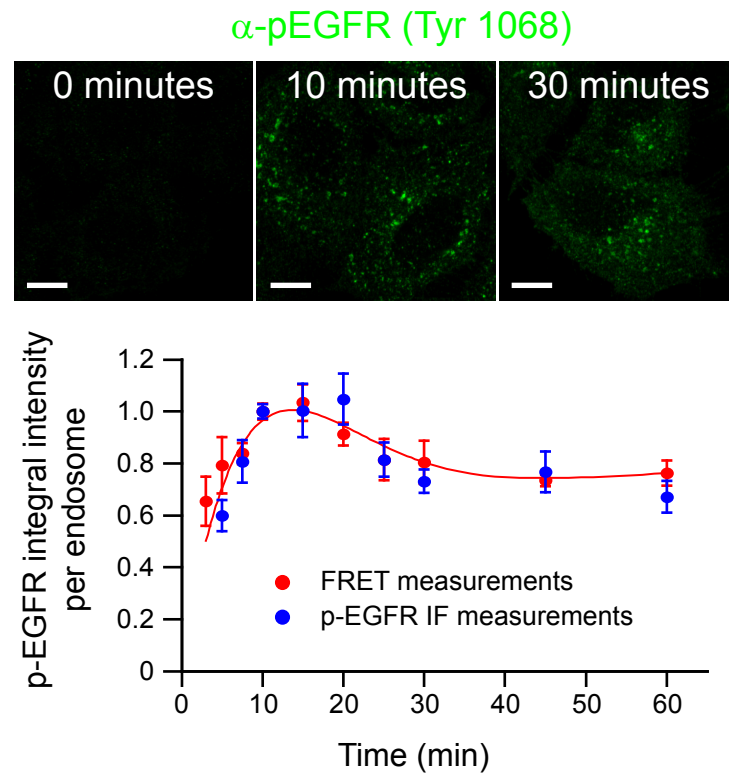

Supplement: supp [file elife_poa_e06156_Figure_1_figure_supplement_4.pdf › elife_poa_e06156_Figure_1_figure_supplement_4.pdf]

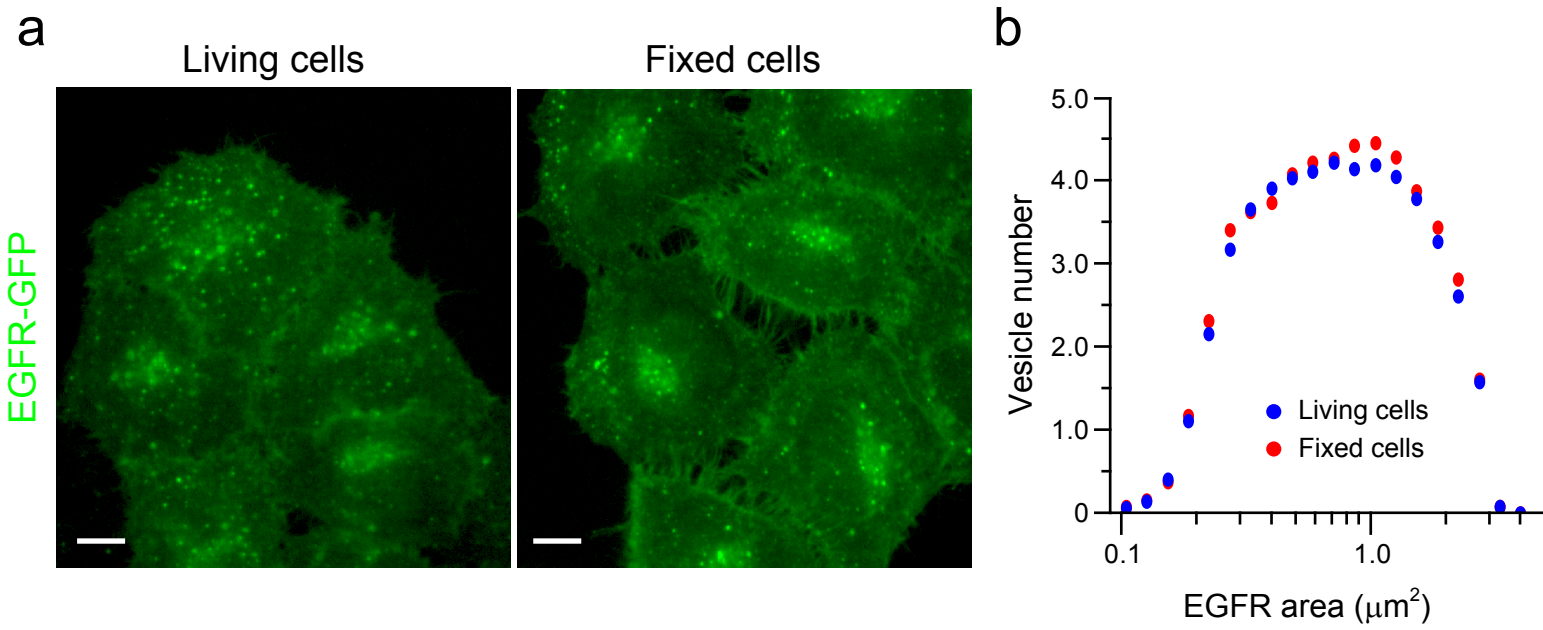

Supplement: supp [file elife_poa_e06156_Figure_1_figure_supplement_5.pdf › elife_poa_e06156_Figure_1_figure_supplement_5.pdf]

Villaseñor\_Figure 1 - figure supplement 6

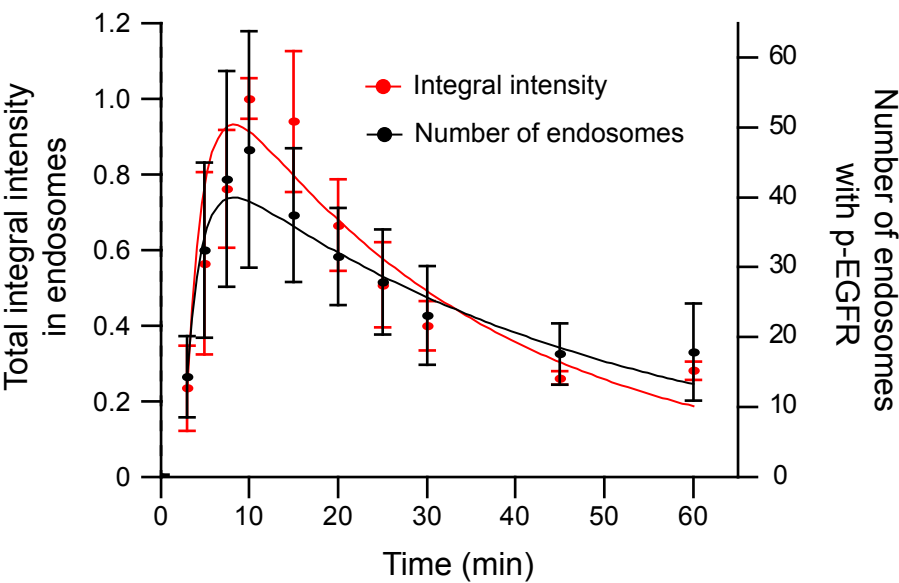

Supplement: supp [file elife_poa_e06156_Figure_1_figure_supplement_6.pdf › elife_poa_e06156_Figure_1_figure_supplement_6.pdf]

Villaseñor\_Figure 1 - figure supplement 7

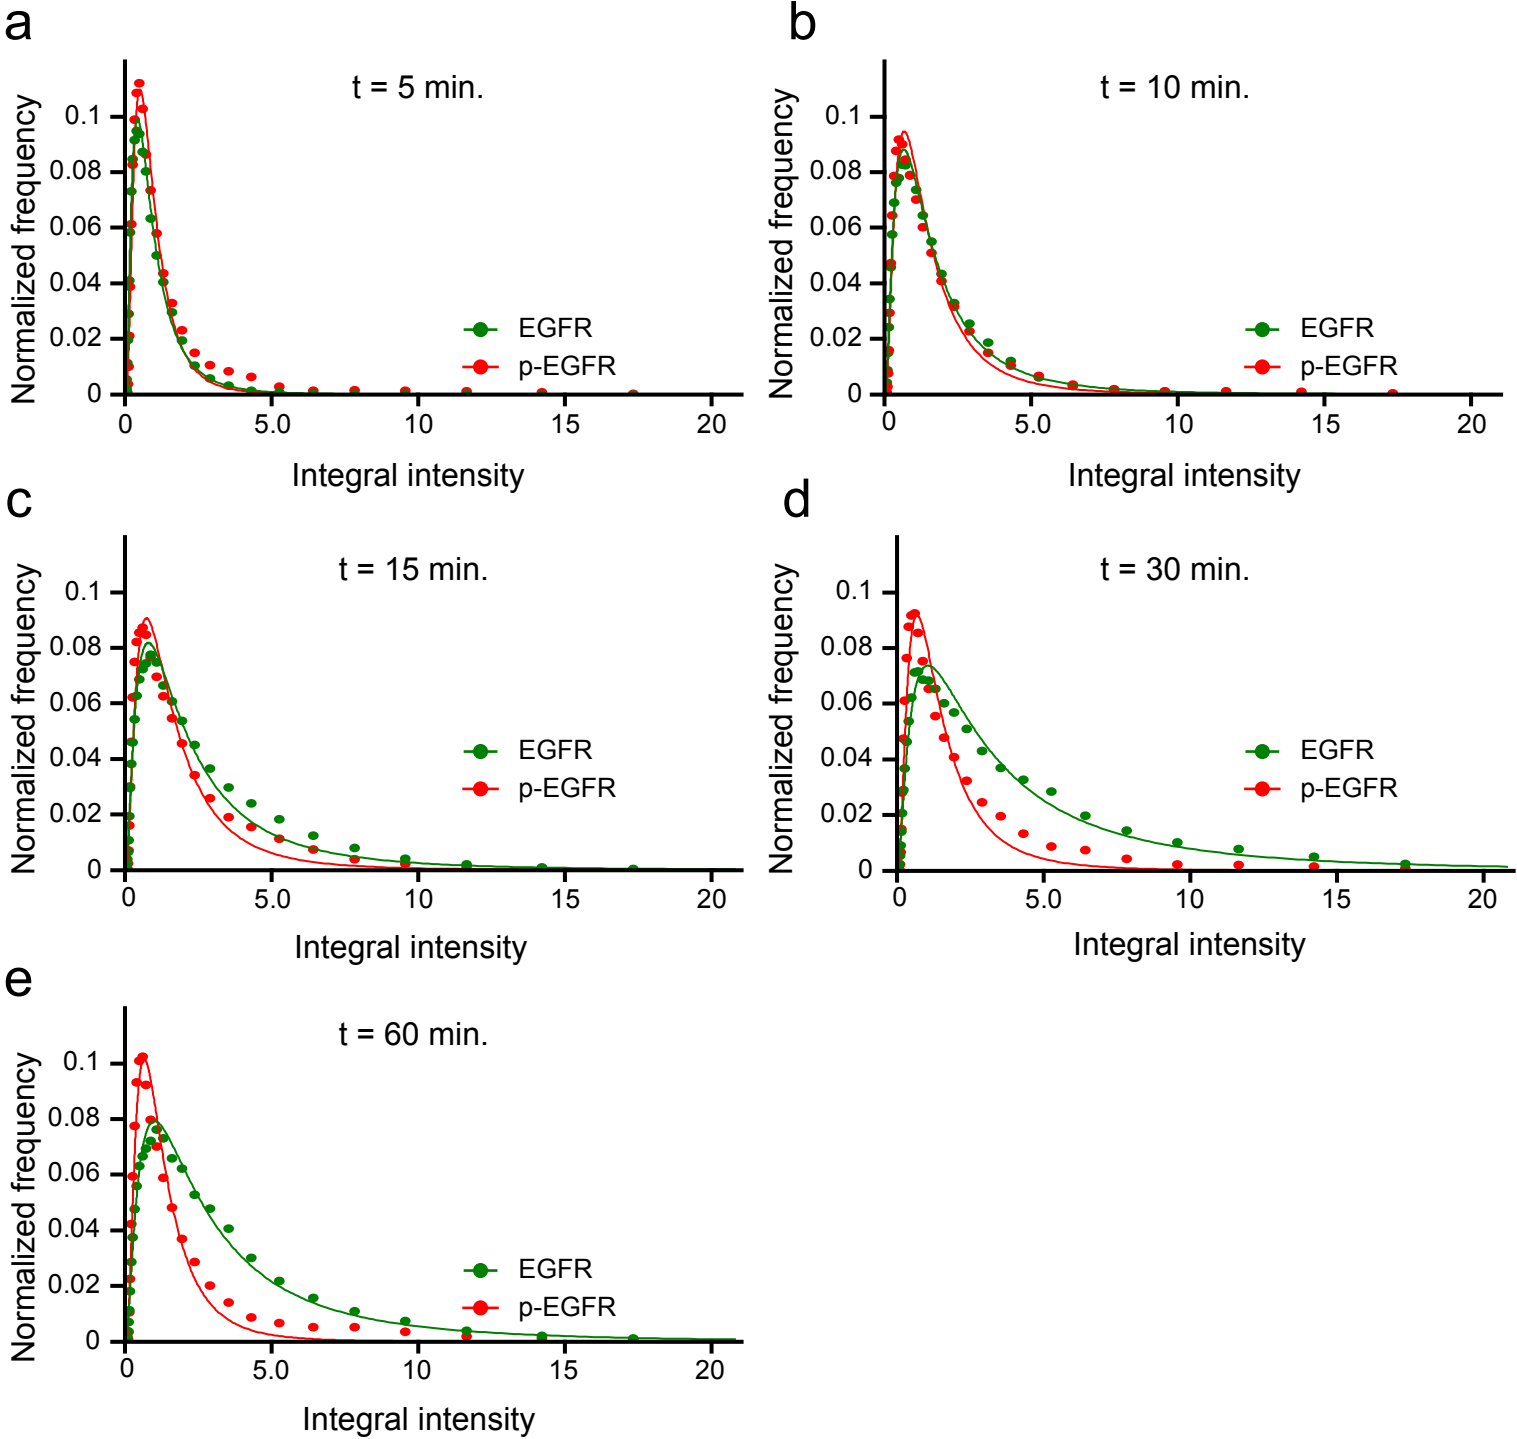

Supplement: supp [file elife_poa_e06156_Figure_1_figure_supplement_7.pdf › elife_poa_e06156_Figure_1_figure_supplement_7.pdf]

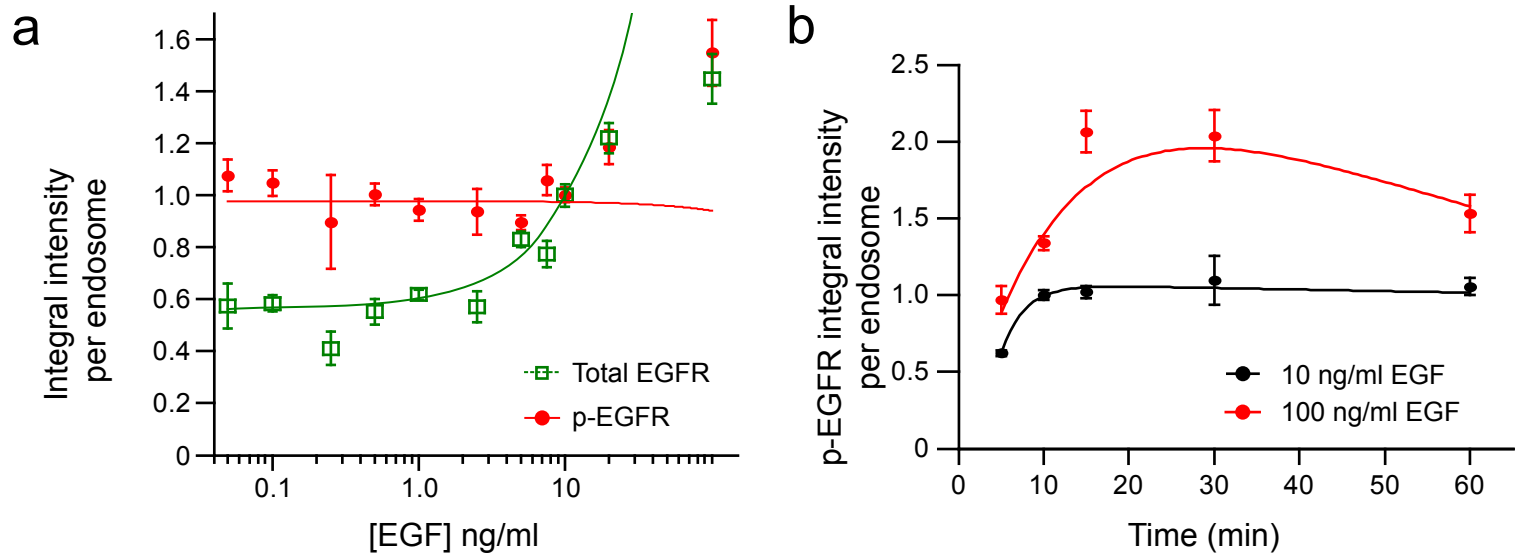

Supplement: supp [file elife_poa_e06156_Figure_1_figure_supplement_8.pdf › elife_poa_e06156_Figure_1_figure_supplement_8.pdf]

a

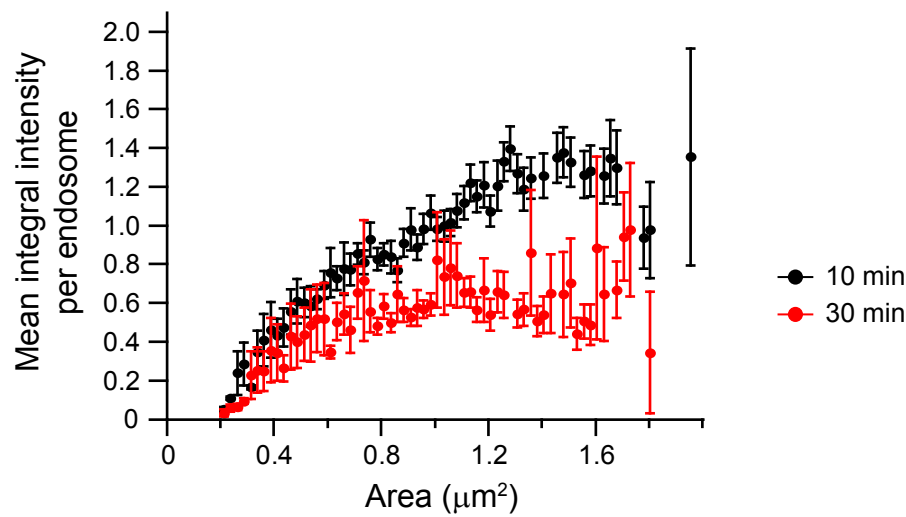

b

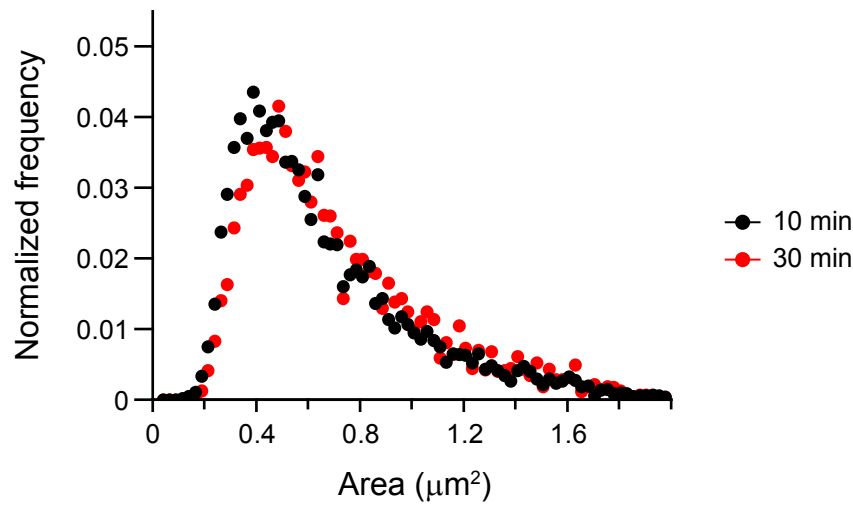

Supplement: supp [file elife_poa_e06156_Figure_1_figure_supplement_9.pdf › elife_poa_e06156_Figure_1_figure_supplement_9.pdf]

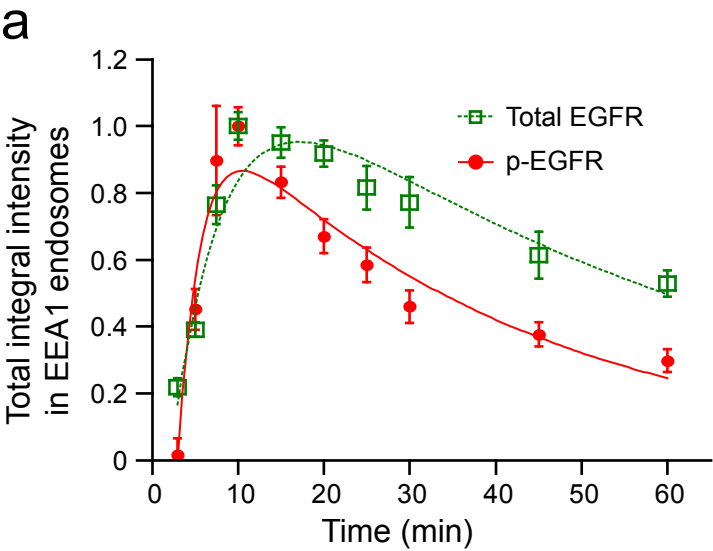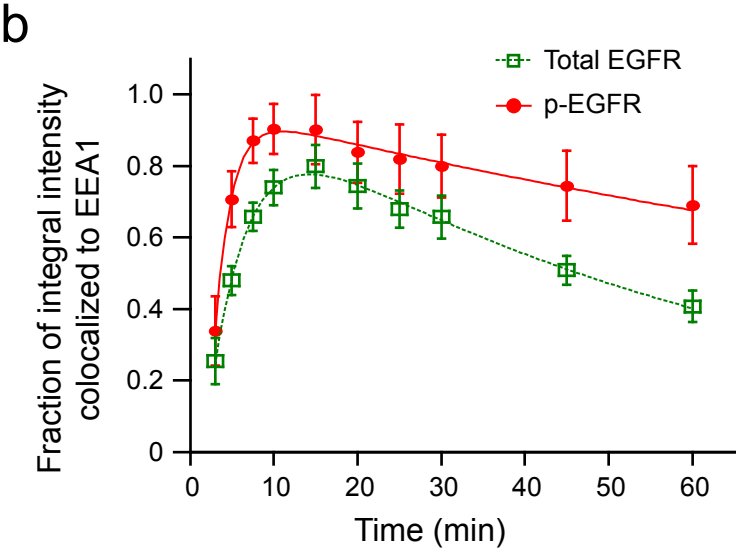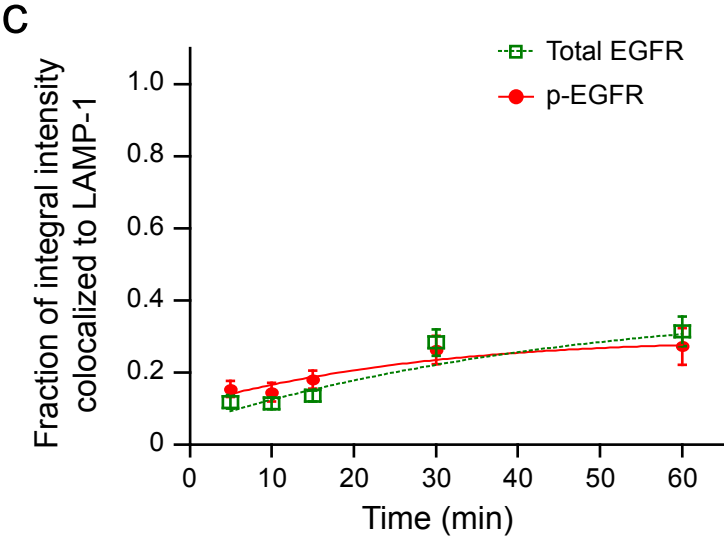

Supplement: supp [file elife_poa_e06156_Figure_2_figure_supplement_1.pdf › elife_poa_e06156_Figure_2_figure_supplement_1.pdf]

# Villaseñor\_Figure 2 - figure supplement 2

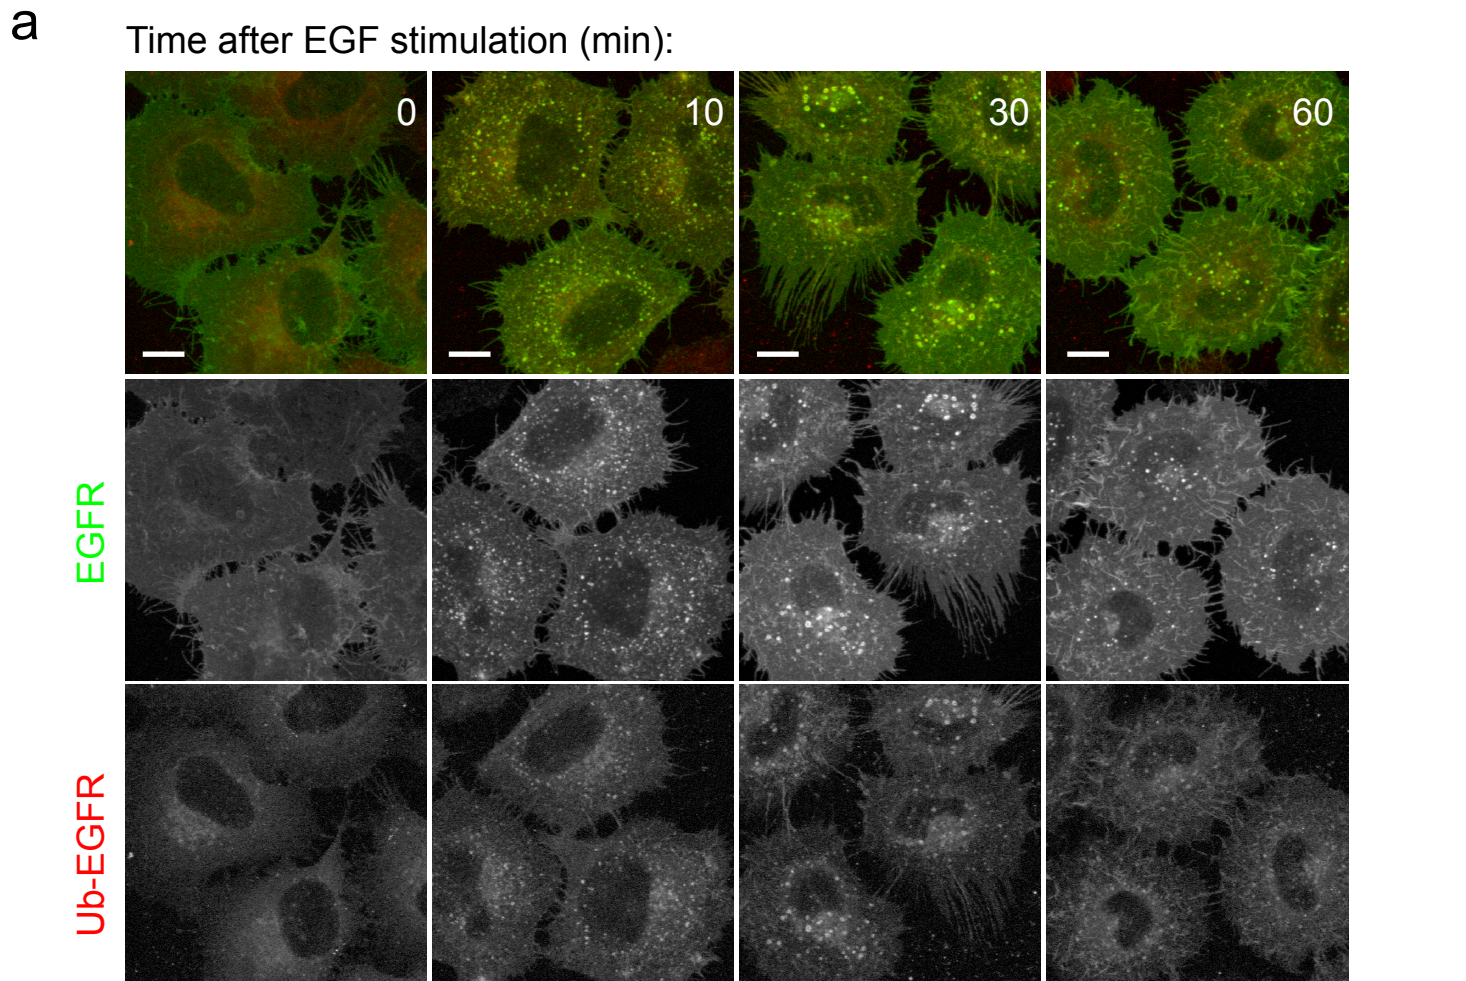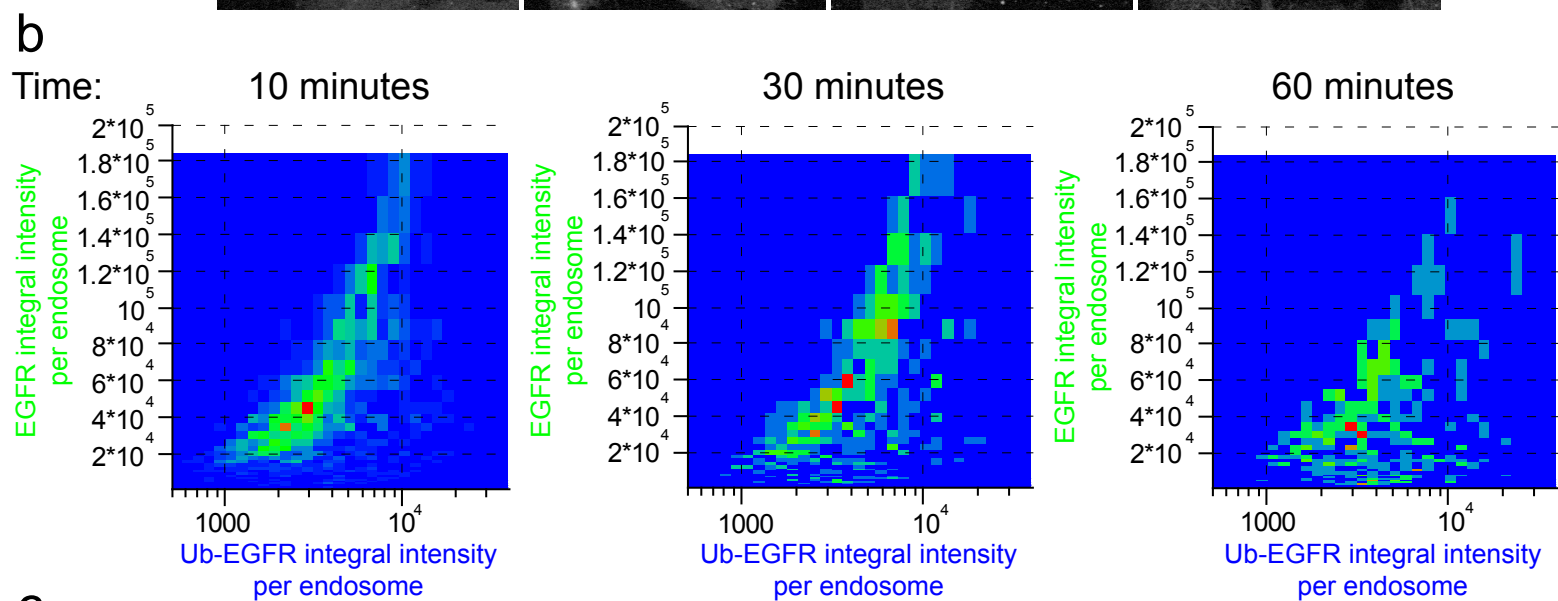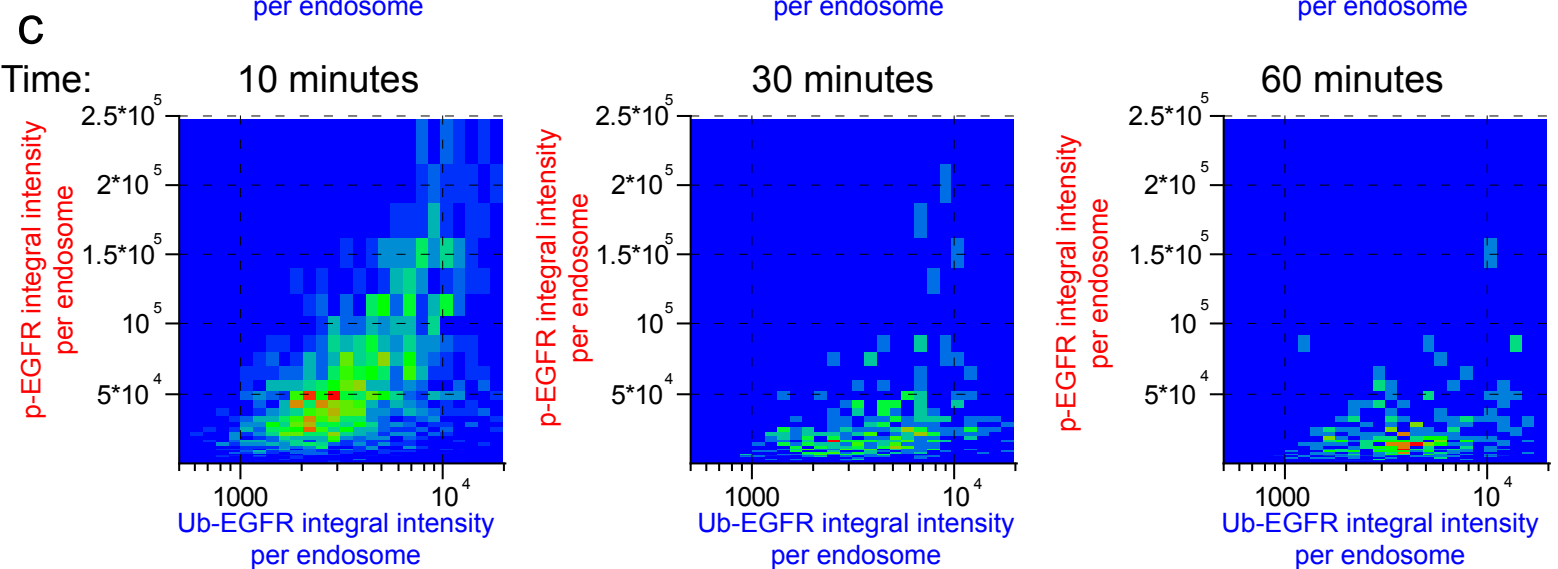

Supplement: supp [file elife_poa_e06156_Figure_2_figure_supplement_2.pdf › elife_poa_e06156_Figure_2_figure_supplement_2.pdf]

Villaseñor\_Figure 2 - figure supplement 3

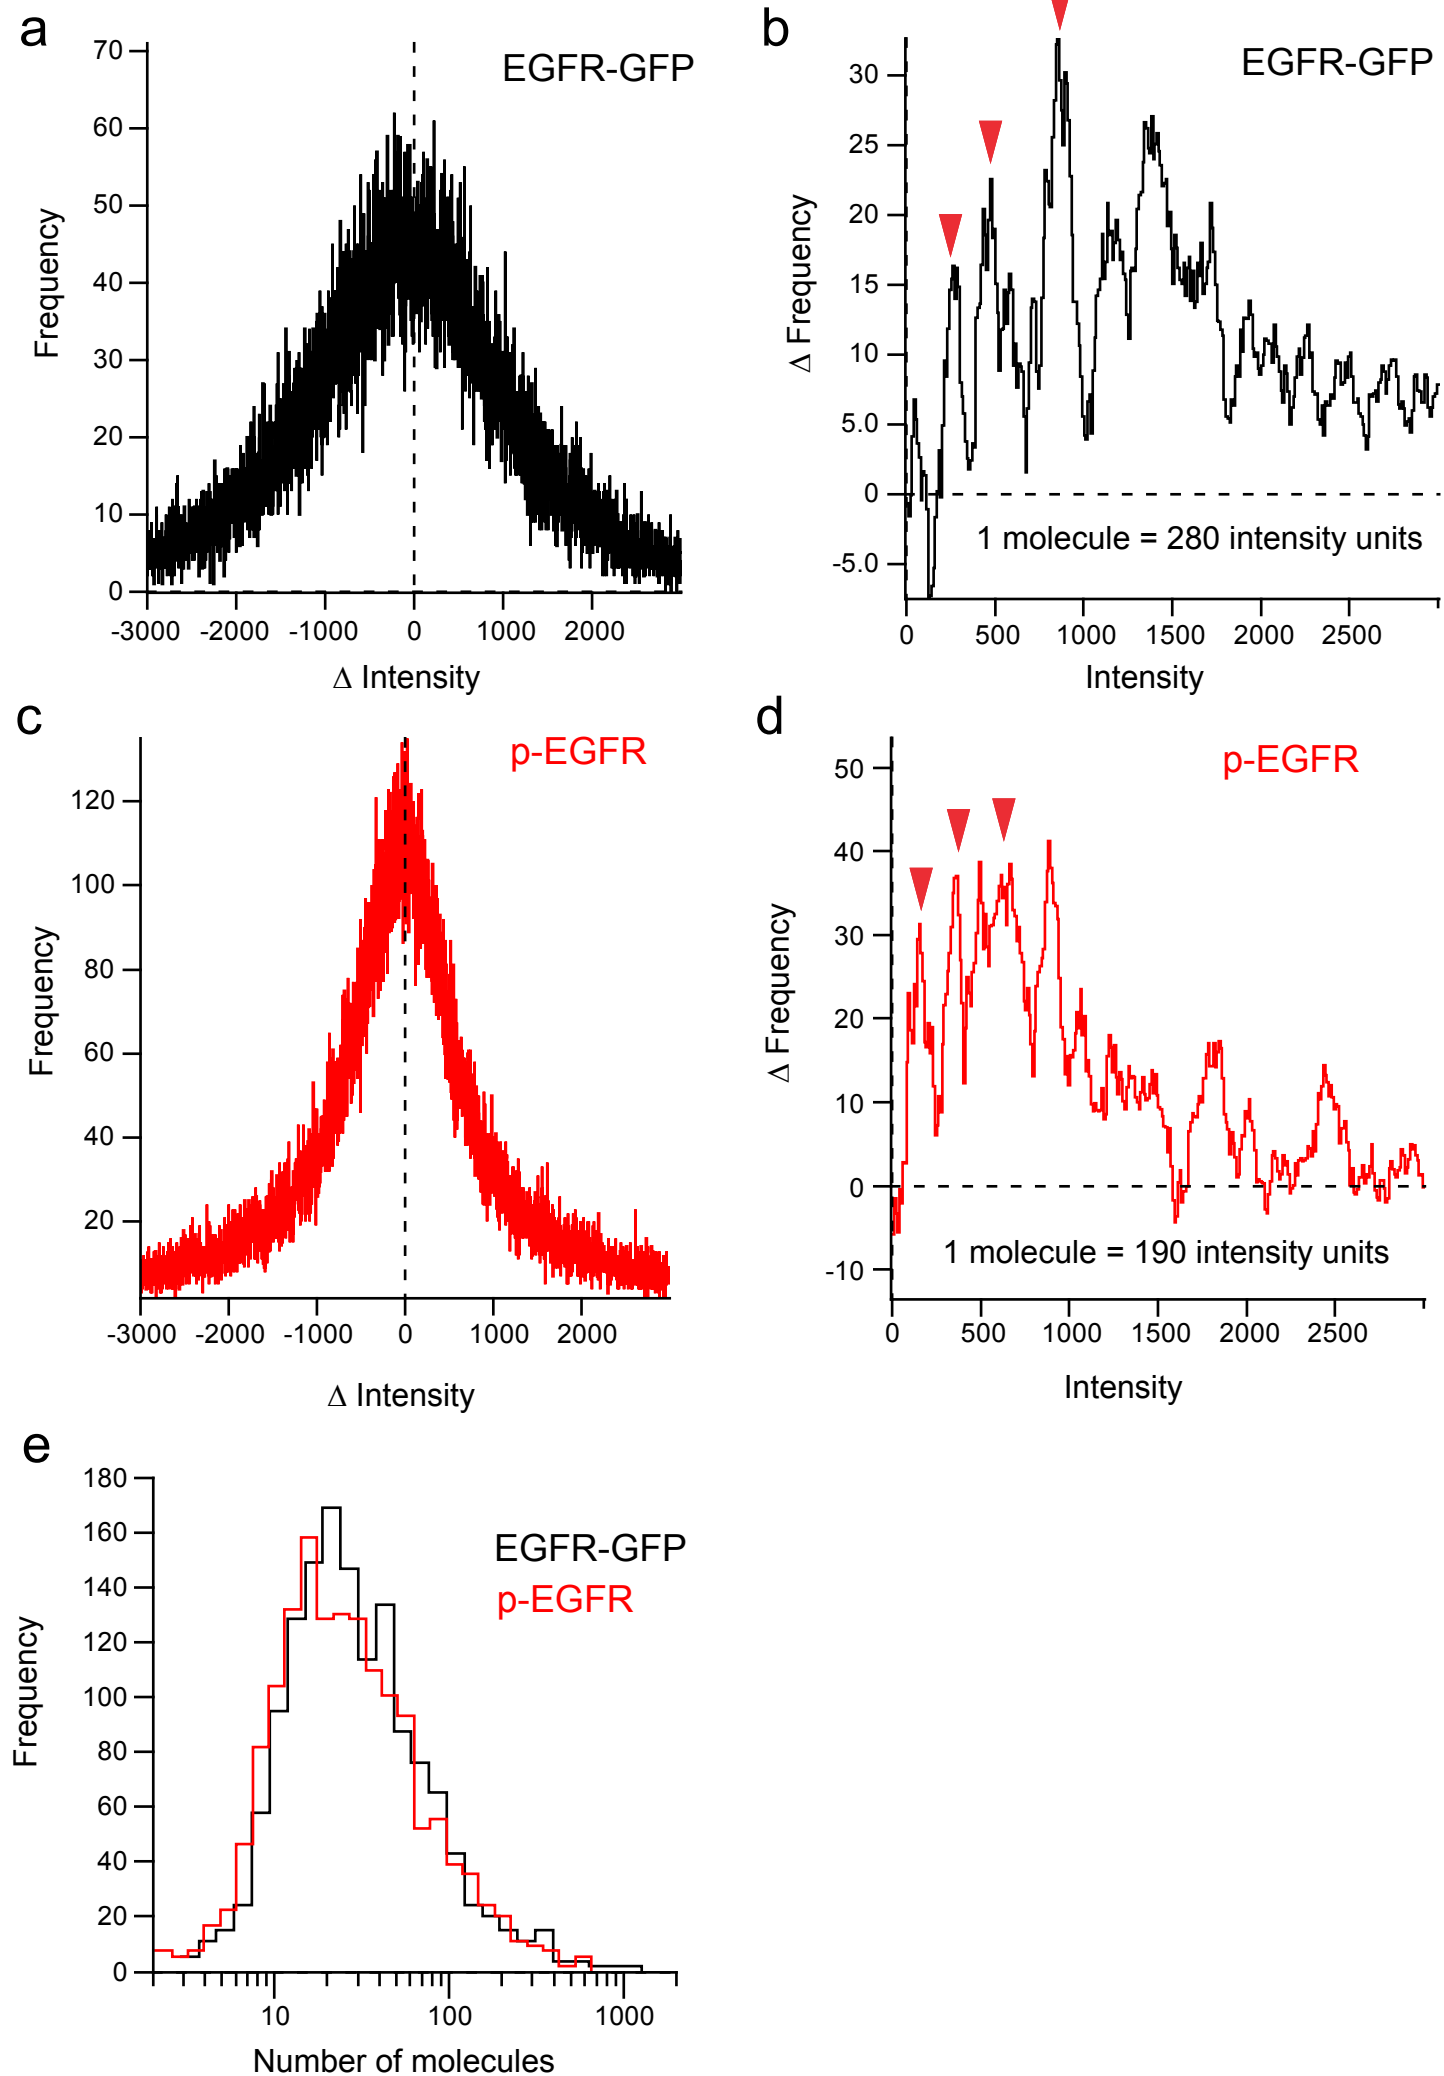

Supplement: supp [file elife_poa_e06156_Figure_2_figure_supplement_3.pdf › elife_poa_e06156_Figure_2_figure_supplement_3.pdf]

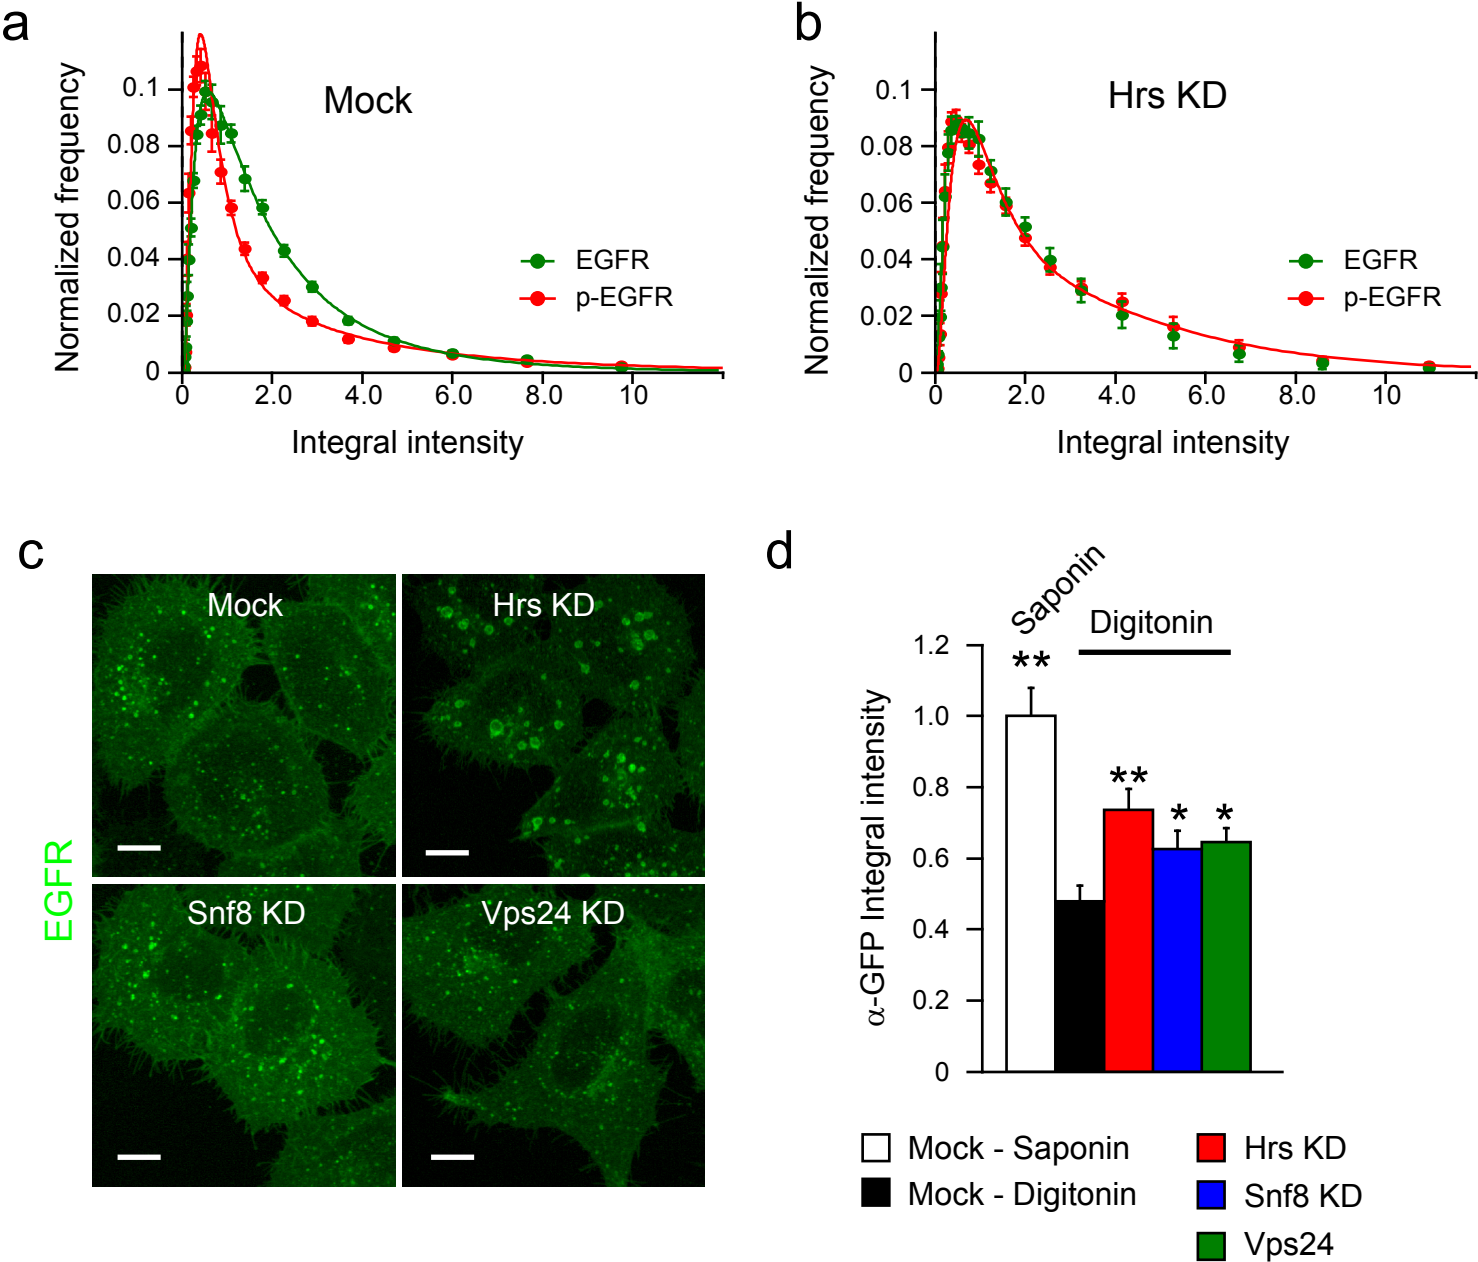

Supplement: supp [file elife_poa_e06156_Figure_2_figure_supplement_4.pdf › elife_poa_e06156_Figure_2_figure_supplement_4.pdf]

Villaseñor\_Figure 2 - figure supplement 5

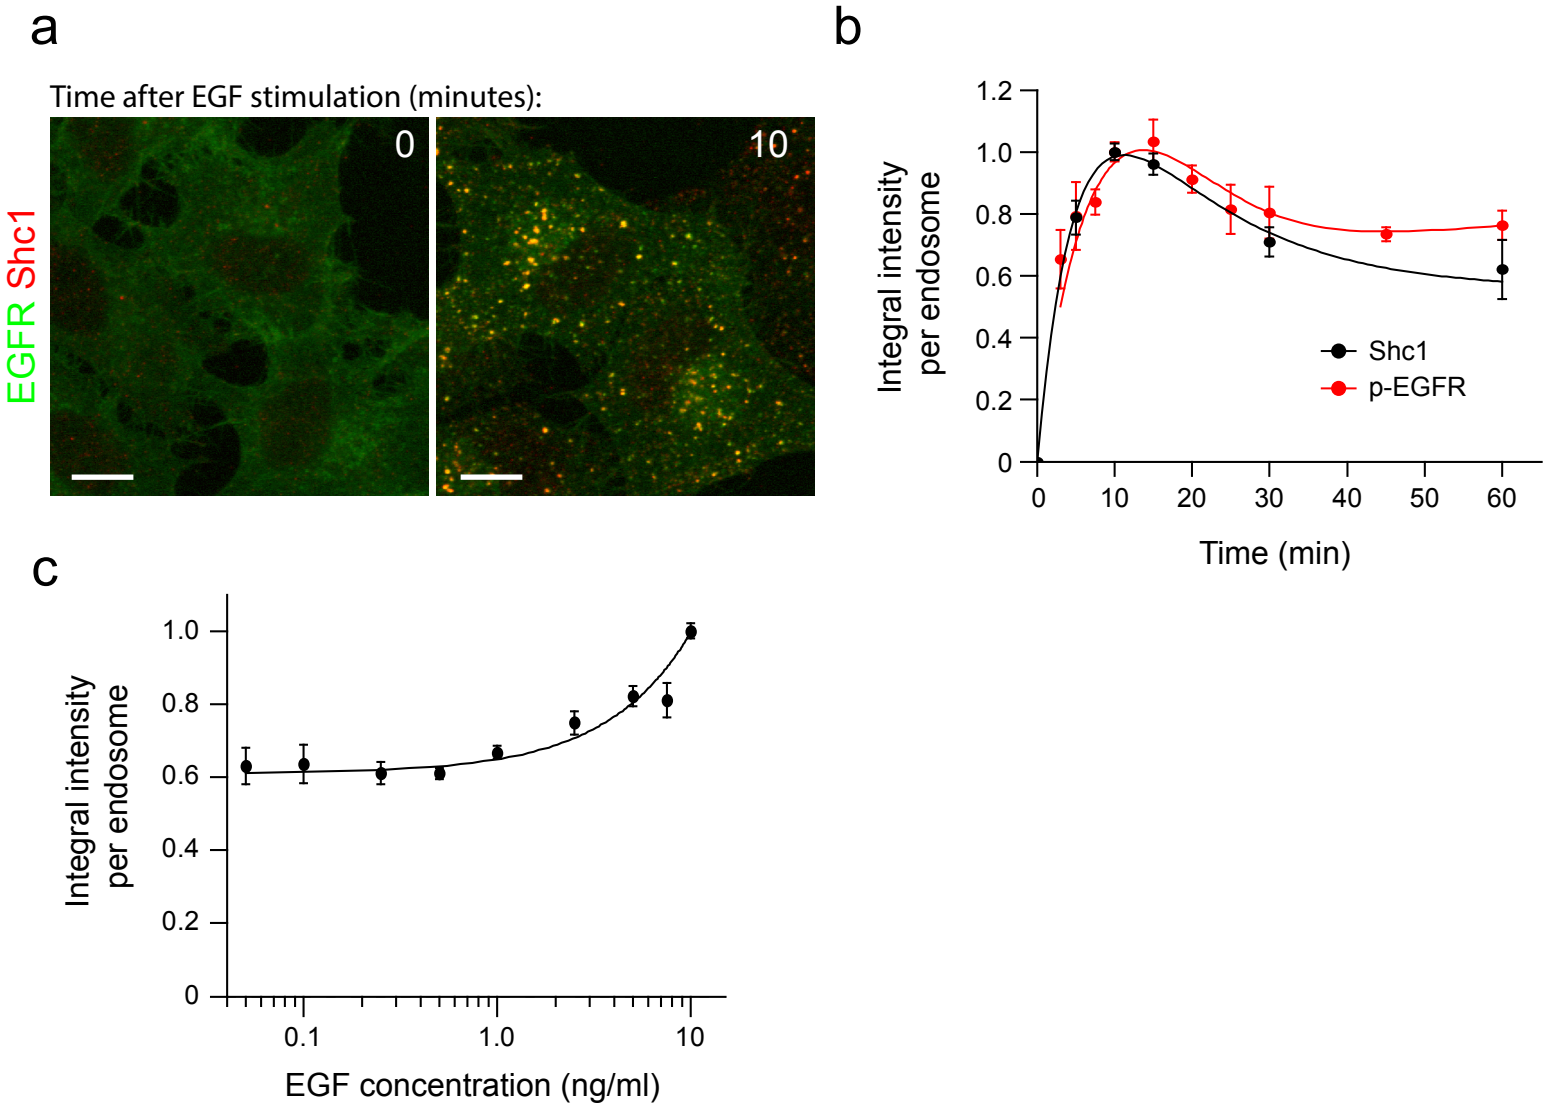

Supplement: supp [file elife_poa_e06156_Figure_2_figure_supplement_5.pdf › elife_poa_e06156_Figure_2_figure_supplement_5.pdf]

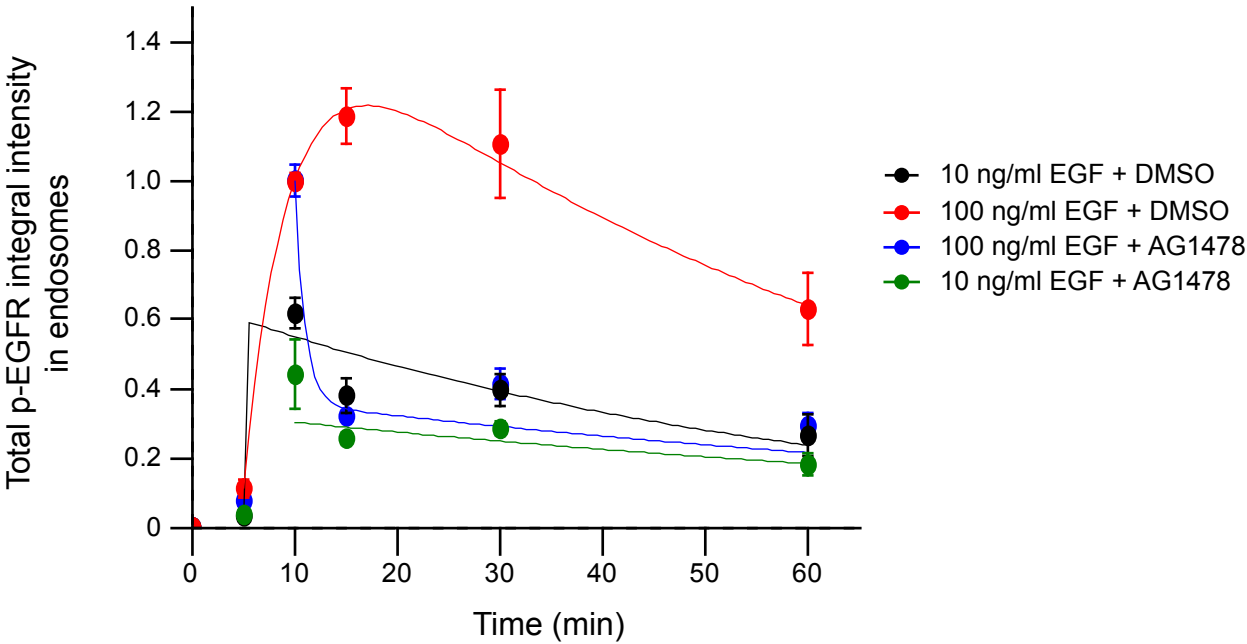

Supplement: supp [file elife_poa_e06156_Figure_2_figure_supplement_6.pdf › elife_poa_e06156_Figure_2_figure_supplement_6.pdf]

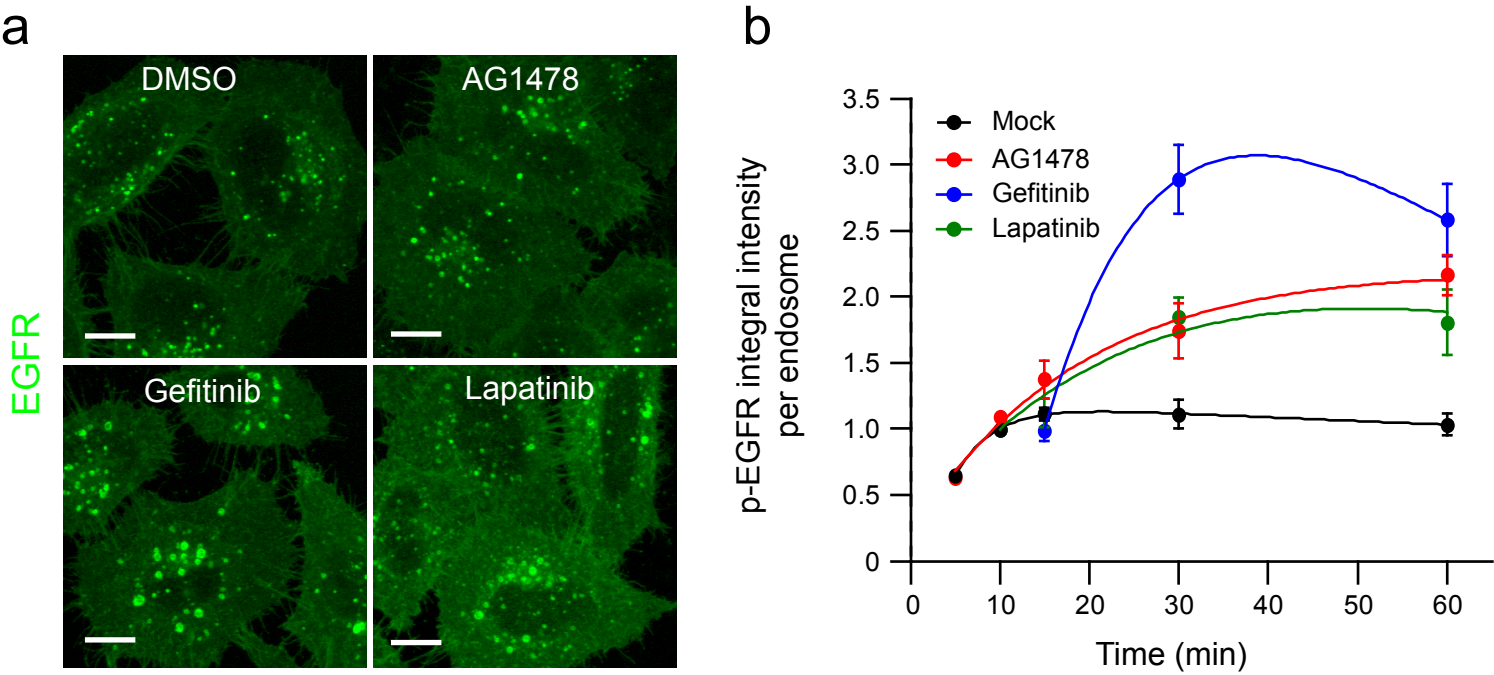

Supplement: supp [file elife_poa_e06156_Figure_2_figure_supplement_7.pdf › elife_poa_e06156_Figure_2_figure_supplement_7.pdf]

Villaseñor\_Figure 2 - figure supplement 8

a

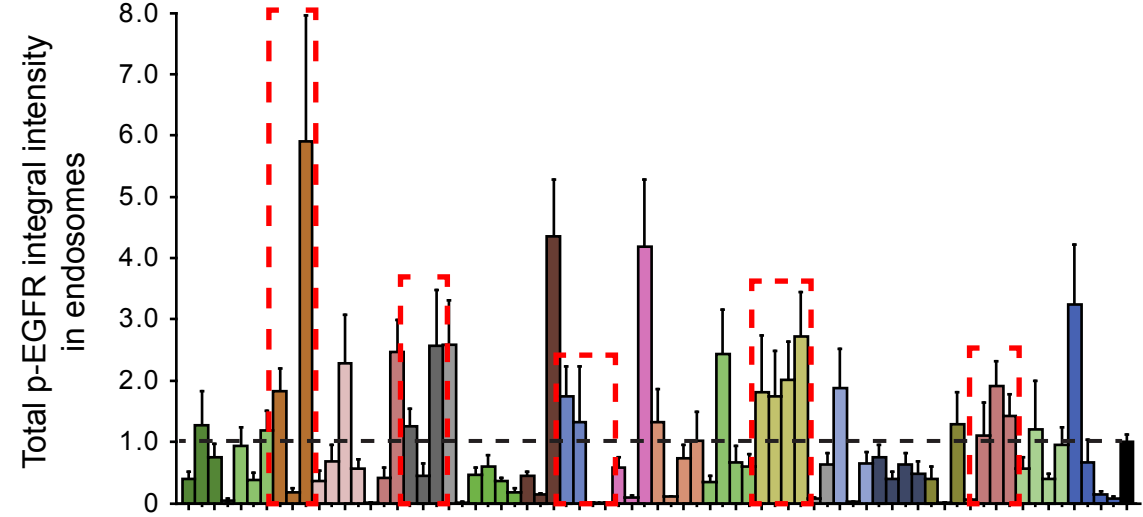

b

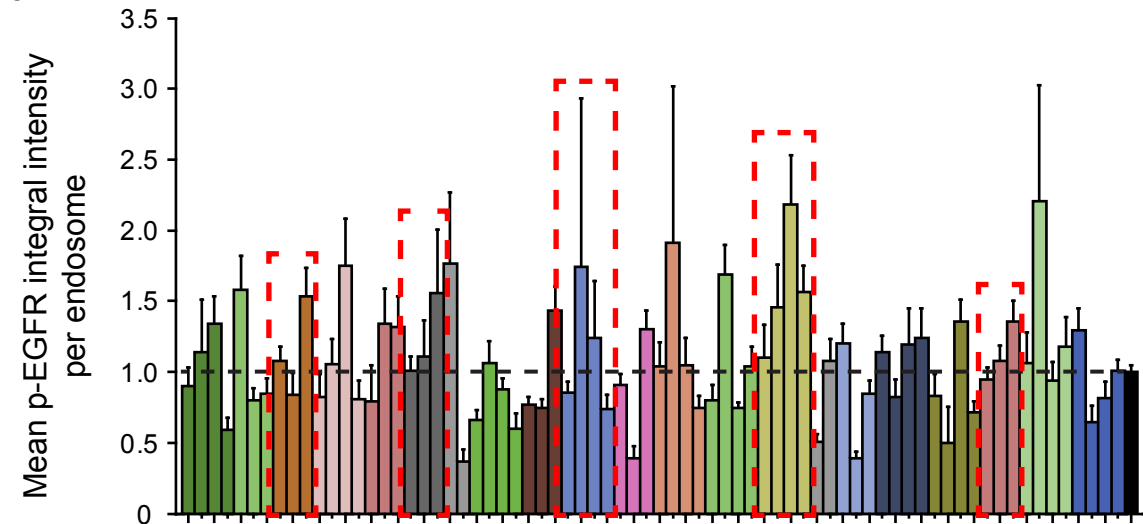

Supplement: supp [file elife_poa_e06156_Figure_2_figure_supplement_8.pdf › elife_poa_e06156_Figure_2_figure_supplement_8.pdf]

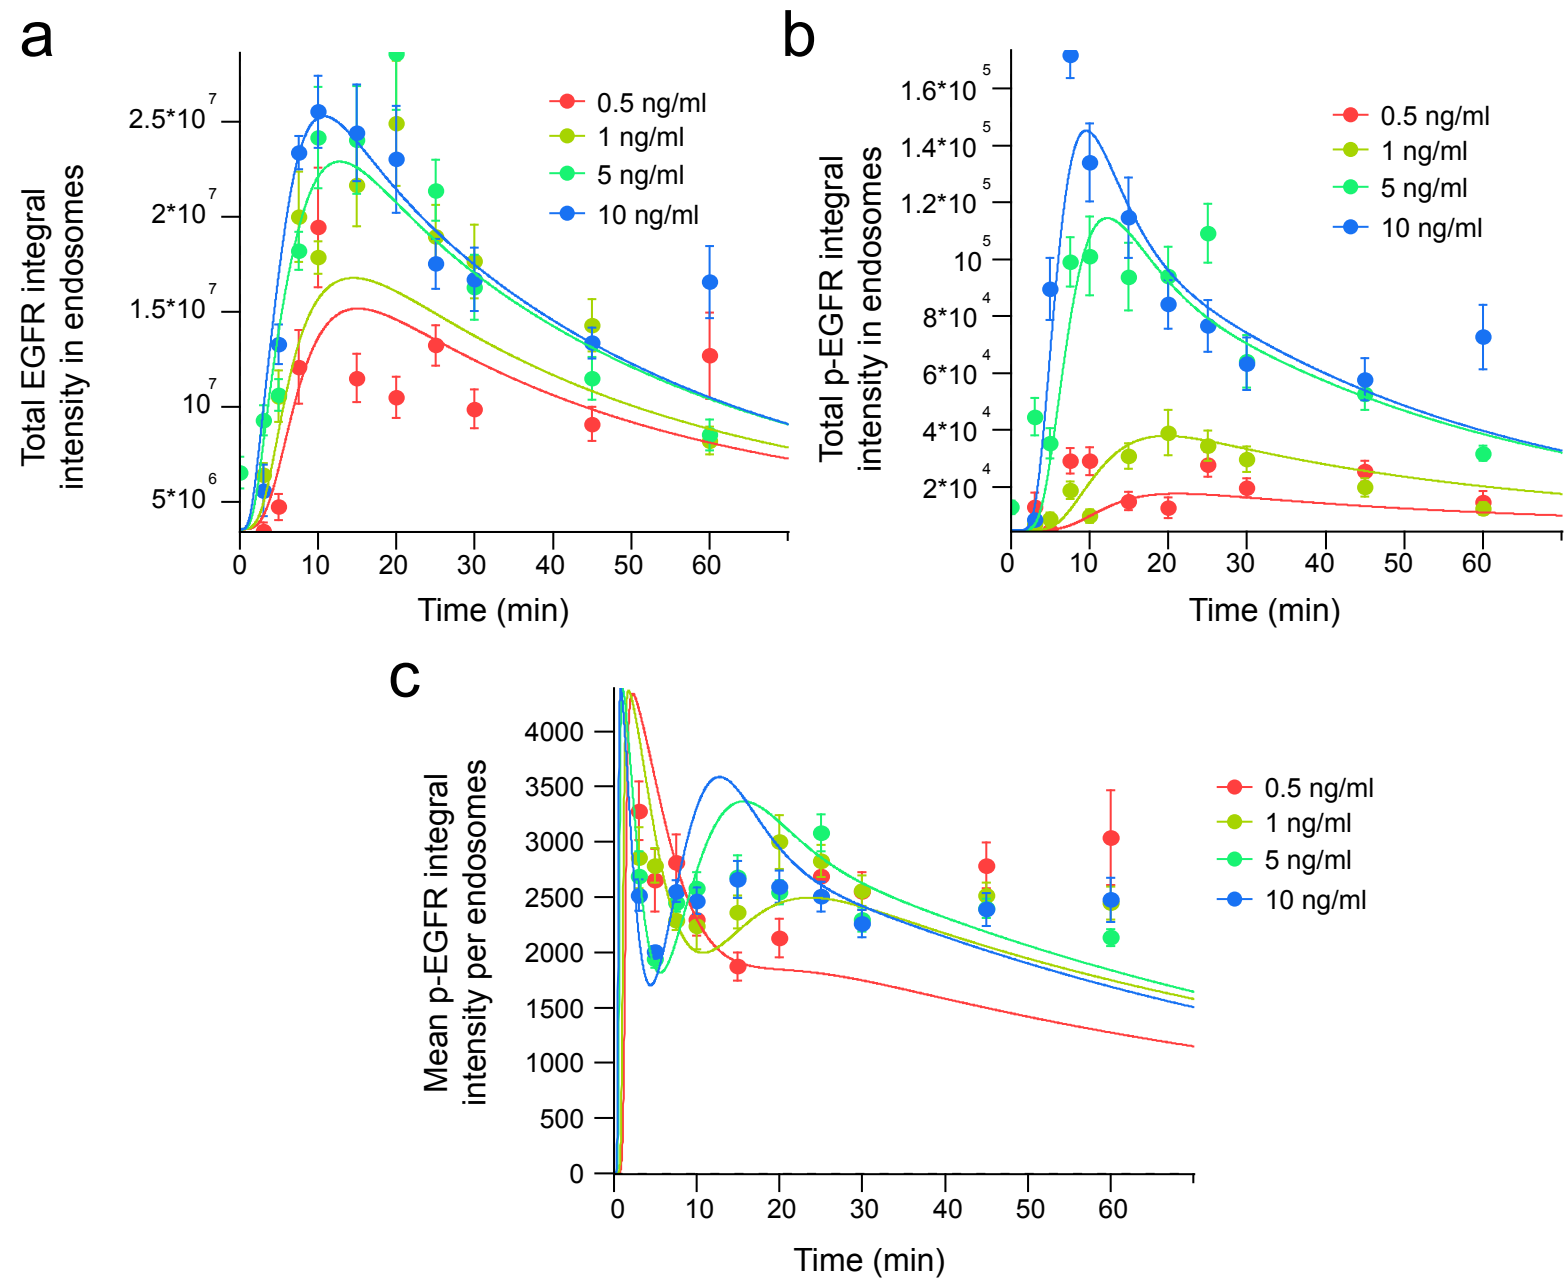

Supplement: supp [file elife_poa_e06156_Figure_3_figure_supplement_1.pdf › elife_poa_e06156_Figure_3_figure_supplement_1.pdf]

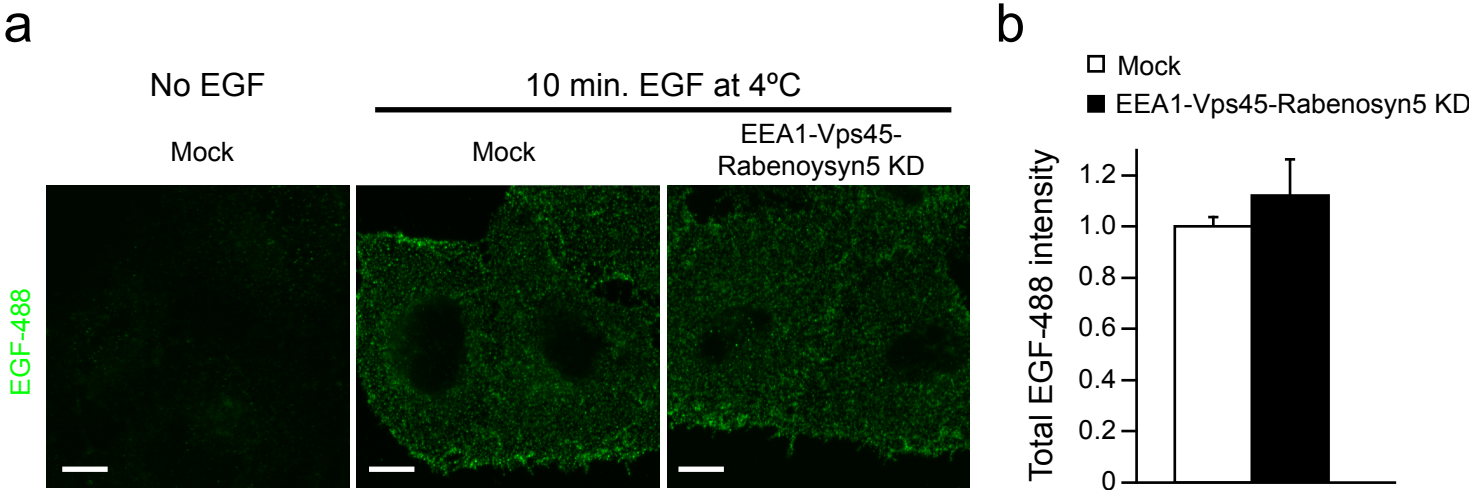

Supplement: supp [file elife_poa_e06156_Figure_4_figure_supplement_1.pdf › elife_poa_e06156_Figure_4_figure_supplement_1.pdf]

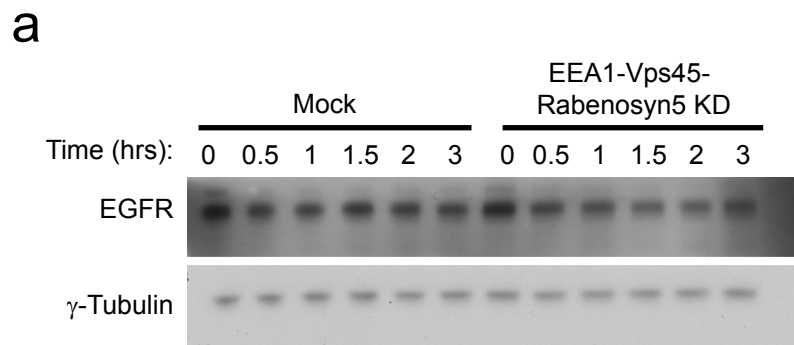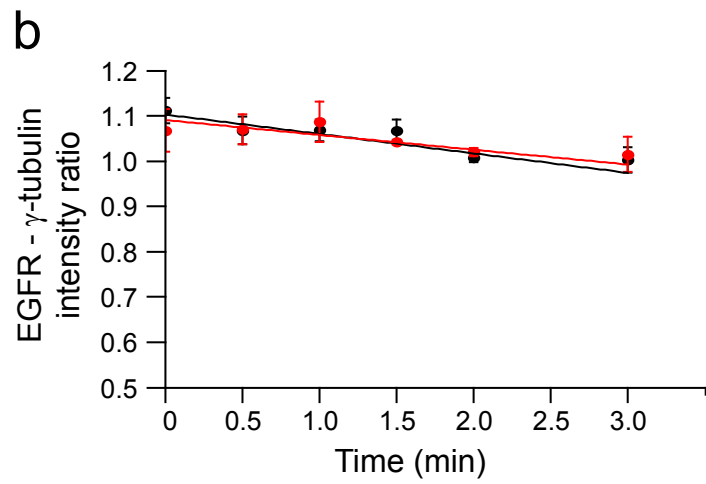

Supplement: supp [file elife_poa_e06156_Figure_4_figure_supplement_2.pdf › elife_poa_e06156_Figure_4_figure_supplement_2.pdf]

a

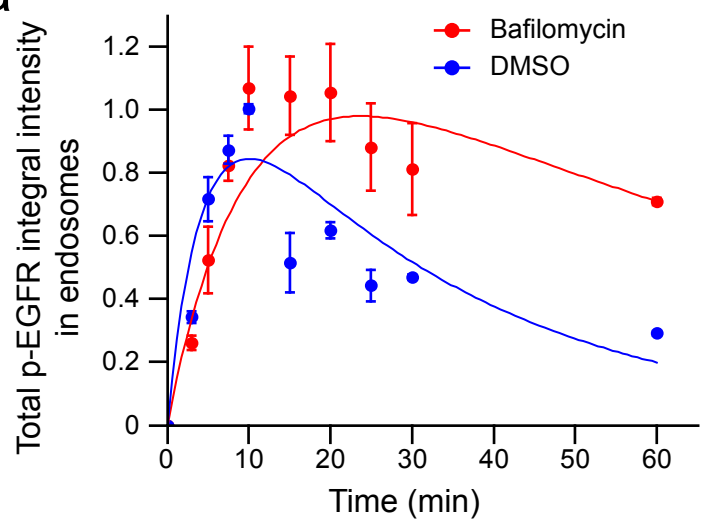

b

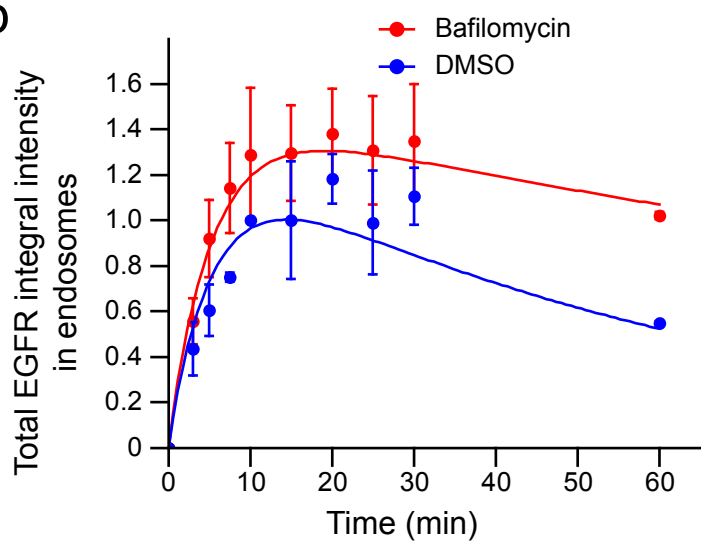

c

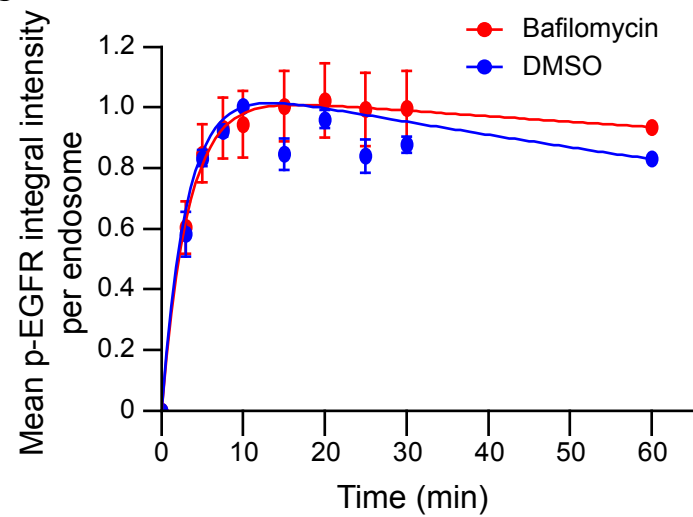

Supplement: supp [file elife_poa_e06156_Figure_4_figure_supplement_3.pdf › elife_poa_e06156_Figure_4_figure_supplement_3.pdf]

Villaseñor\_Figure 6 - figure supplement 1

a

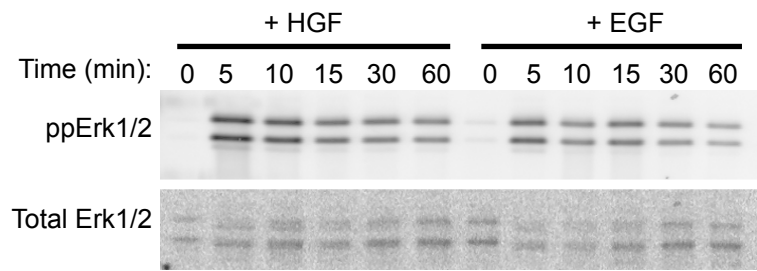

b

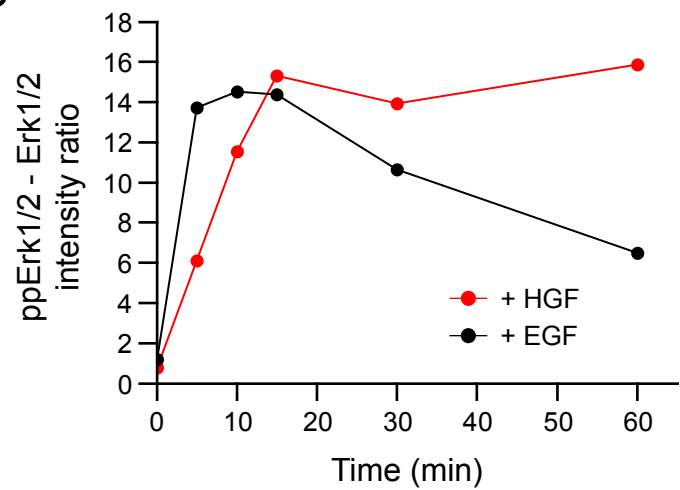

Supplement: supp [file elife_poa_e06156_Figure_6_figure_supplement_1.pdf › elife_poa_e06156_Figure_6_figure_supplement_1.pdf]

# Villaseñor\_Figure 7 - figure supplement 1

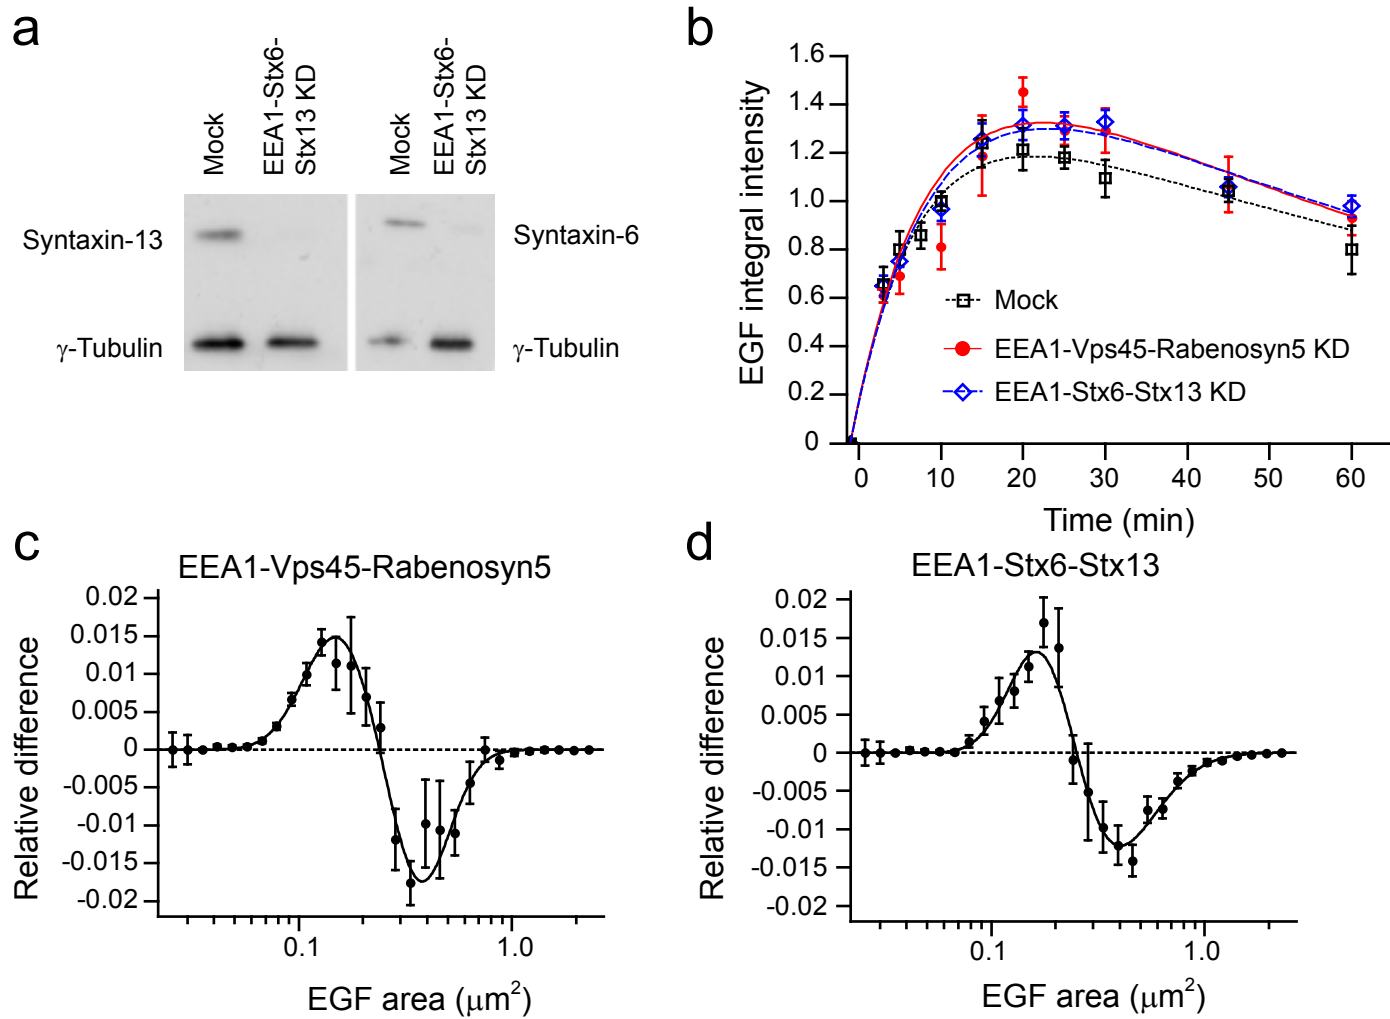

Supplement: supp [file elife_poa_e06156_Figure_7_figure_supplement_1.pdf › elife_poa_e06156_Figure_7_figure_supplement_1.pdf]

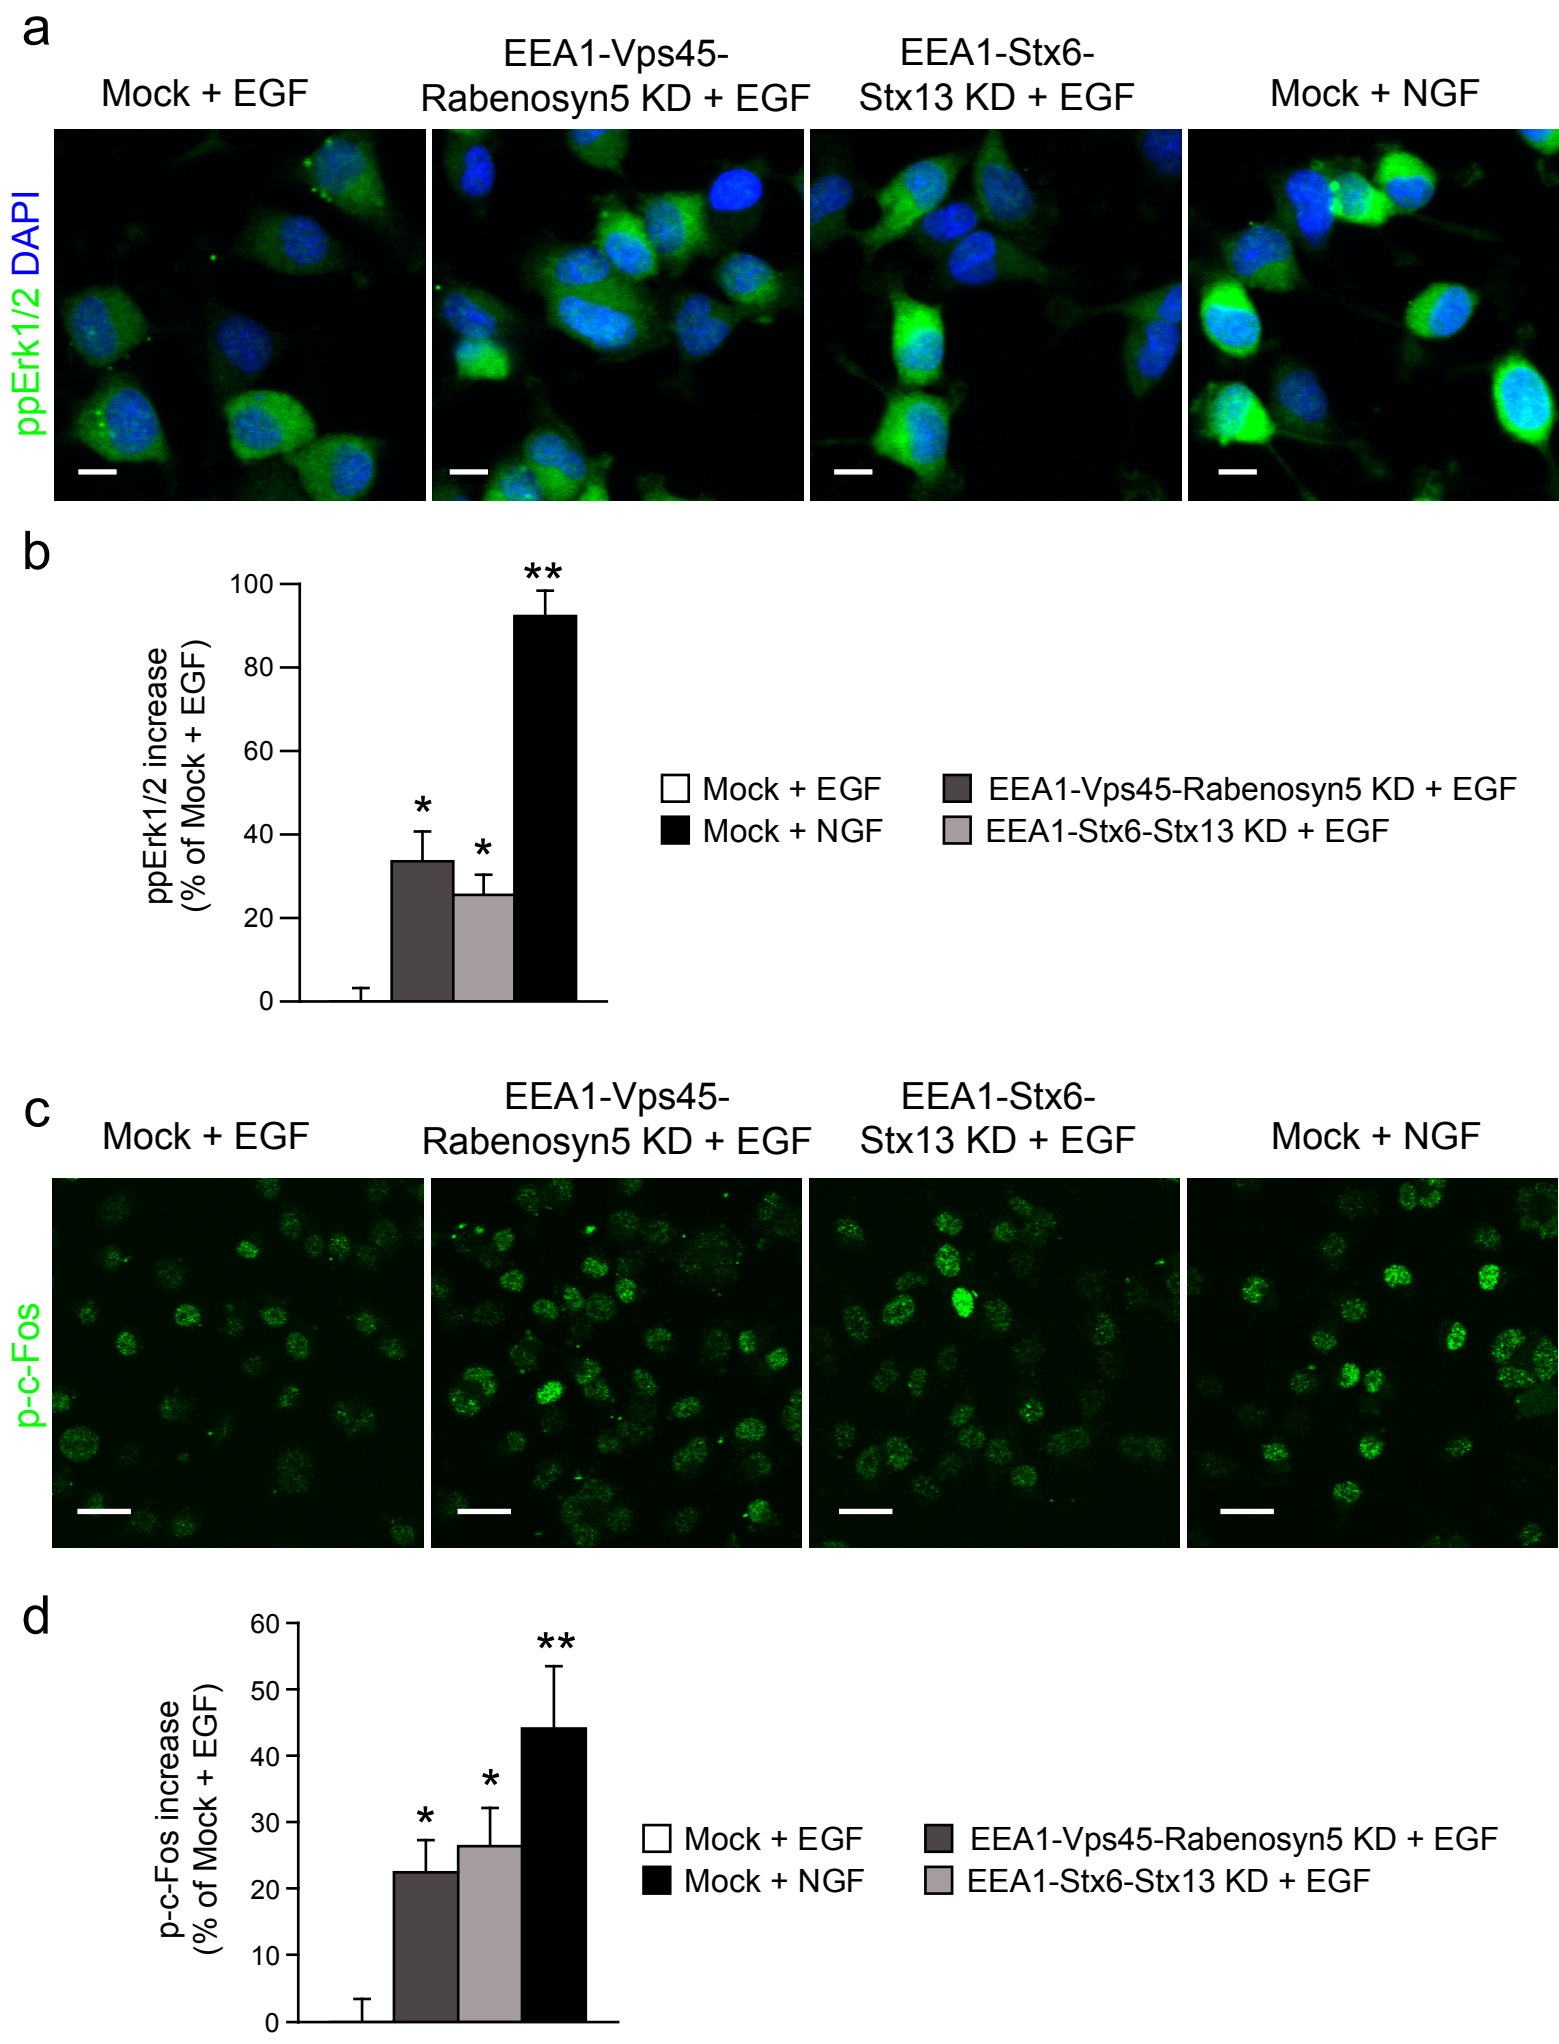

Supplement: supp [file elife_poa_e06156_Figure_7_figure_supplement_2.pdf › elife_poa_e06156_Figure_7_figure_supplement_2.pdf]
